# Supplementary material for: A nine-ring fused terrylene diimide exhibits switching between red TADF and near-IR room temperature phosphorescence
Source: Royal Society of Chemistry journal article supplement (doi:10.1039/d4sc01040j), 2024-01-01
Supplement: d4sc01040j1.pdf [file d4sc01040j1.pdf]

# **A Nine-Ring Fused Terrylene Diimide Exhibits Switching between Red TADF and Near-IR Room Temperature Phosphorescence**

Shivangee Jha, Kundan Singh Mehra, Mandira Dey, Sujesh S, Debashree Ghosh,\* Pradip  
Kumar Mondal, Maurizio Polentarutti, and Jeyaraman Sankar\*

Department of Chemistry, Indian Institute of Science Education and Research (IISER) Bhopal,  
Bhopal Bypass Road, Bhopal, India – 462066.

E-mail: [sankar@iiserb.ac.in](mailto:sankar@iiserb.ac.in)

## Table of contents

|                            |         |
|----------------------------|---------|
| Table of contents          | S1      |
| I. General Information     | S2-S3   |
| II. Synthetic Procedures   | S3-S6   |
| III. Photophysical Studies | S6-S13  |
| IV. Computational studies  | S14-S29 |
| V. Crystallographic data   | S29-S30 |
| VI. NMR spectra            | S31-S34 |
| VII. Mass spectra          | S34-S36 |
| VIII. References           | S37     |

## I. General Information

### Materials:

All the chemicals required for synthesis were purchased from Sigma Aldrich, TCI, and Spectrochem and used directly without further purification. All the air or moisture-sensitive reactions were carried out under an argon atmosphere. For all the photophysical studies spectroscopy-grade solvents were used. Compounds synthesized here are purified by silica-gel, alumina column chromatography and size-exclusion column chromatography using Bio-beads from BioRad with tetrahydrofuran (THF) as solvent followed by recrystallization.

### Characterization Techniques:

All the NMR experiments were performed either on Bruker Avance 500 or 700 MHz spectrometers in  $\text{CDCl}_3$  and  $\text{C}_2\text{D}_2\text{Cl}_4$  as solvents. Chemical shift values ( $\delta$ ) reported in parts per million (ppm) using residual solvents peak as a reference ( $^1\text{H}$  NMR- 7.26ppm for  $\text{CDCl}_3$ , and  $^1\text{H}$  NMR- 5.90ppm, for  $\text{C}_2\text{D}_2\text{Cl}_4$ ). Mass spectra for all compounds were acquired on a microTOF-QII high-resolution mass spectrometer using Bruker Daltonics coupled to a Water UPLC system. Matrix-assisted LASER desorption/ionization (MALDI) was recorded using the Bruker Ultra Flex extreme MALDI-TOF mass spectrometer.

### Photophysical Measurements:

Steady-state absorption spectra were recorded on a Cary 900 UV/VIS/NIR spectrophotometer. Steady-state emission measurements were recorded on a Horiba Scientific Fluoromax 04. Lifetime decay measurements were performed in Delta Flex-01-DD/Horiba time-correlated single-photon counting (TCSPC) using nanosecond pulse diode laser. Phosphorescence emission experiments were performed in phosphorescence division and lifetimes through decay by delay method on Horiba Scientific Fluoromax 04. Low temperature experiments were performed using Liquid Nitrogen Dewar setup. Fluorescence and delayed fluorescence absolute quantum yields were measured using a quanta-phi integrating sphere connected to Fluoromax 04 under ambient conditions. The delayed fluorescence absolute quantum yields were measured with a delay time of 100  $\mu\text{s}$  in phosphorescence division using a quanta-phi integrating sphere connected to Fluoromax 04.

### Formulae:

$$k_f = \phi_f / \tau_f$$

$$k_{df} = \phi_{df} / \tau_{df}$$

$$k_r^s = \phi_f k_f + \phi_{df} k_{df}$$

$$\phi_{ISC} = 1 - \phi_f$$

$$k_{ISC} = k_f(1 - \phi_f)$$

$$k_{RISC} = \frac{k_f k_{df} \phi_{df}}{k_{ISC} \phi_f}$$

$$k_{ph}^r = \phi_{ph} / \tau_{ph}$$

Where

$k_f$  = Radiative decay rate constant for fluorescence

$k_{df}$  = Radiative decay rate constant for delayed fluorescence

$k_{r,s}$  = Overall radiative decay rate constant from  $S_1$  to  $S_0$  state including delayed and prompt.

$k_{ISC}$  = Rate constant for intersystem crossing

$k_{RISC}$  = Rate constant for reverse intersystem crossing

$k_{r,Ph}$  = Radiative decay rate constant for phosphorescence

$\tau_f$  = Fluorescence lifetime

$\tau_{df}$  = Delayed fluorescence lifetime

$\tau_{Ph}$  = Phosphorescence lifetime

$\phi_f$  = Fluorescence quantum yield

$\phi_{df}$  = Delayed fluorescence quantum yield

$\phi_{Ph}$  = Phosphorescence quantum yield

$\phi_{ISC}$  = Efficiency of intersystem crossing

### Crystallographic Details:

Single crystal X-ray diffraction (SCXRD) measurements were performed at the X-ray diffraction beamline (XRD1) of the Elettra Synchrotron (Trieste, Italy).<sup>1</sup> The NHV oil (Jena Bioscience, Jena, Germany) was used to dip and mount the crystal on the goniometer head with nylon loops (MiTeGen, Ithaca, USA). The data was collected at 100 K (nitrogen stream supplied through an Oxford Cryostream 700). The data were obtained using a monochromatic wavelength of 0.700 Å by the rotating crystal method on a Pilatus 2M hybrid-pixel area detector (DECTRIS Ltd., Baden-Daettwil, Switzerland). The diffraction data were integrated using XDS.<sup>2</sup> The crystal structure was solved in Olex2<sup>3</sup> using ShelXT<sup>4</sup> solution program by Intrinsic Phasing, and data refinement were done with the ShelXL<sup>5</sup> refinement package through least-squares minimization.

### Computational Details:

The ground state geometries of **TDI** and **TDI-cDBT** are optimized at UB3LYP/6-31G(d,p) level of theory. The optimized structures are further used to calculate the low lying excited states at SF-TDDFT/6-31G(d,p) level of theory using Q Chem 5.3 software. All the optimizations are performed in Gaussian 09 software.<sup>6</sup>

## II. Synthetic Procedures

### Synthesis of Dibenzothiophene-4-boronic acid pinacol ester (**DBT-B**):

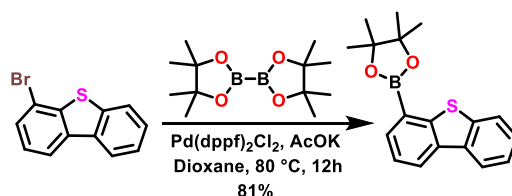

Borylation of 4-Bromodibenzothiophene was done by the modified procedure.<sup>7</sup> In a dry and degassed 100 mL Schlenk flask 4-Bromodibenzothiophene (0.76 mmol, 200 mg), Pd(dppf)<sub>2</sub>Cl<sub>2</sub> (cat. amount), CH<sub>3</sub>COOK (1.75 mmol, 172 mg) and bis(pinacolato)diboron (1.14 mmol, 289 mg) were dissolved in 20 mL dioxane and degassed with argon for 30 minutes. After degassing the mixture was allowed to be stirred at 100 °C for 16 hours. After completion of reaction, the mixture was washed with water 2-3 times and collected over anhydrous Na<sub>2</sub>SO<sub>4</sub> using dichloromethane, and concentrated under vacuum. The residue was purified by silica-gel (mess 100-200) chromatography using DCM:Hexane to afford compound **DBT-B** (190.90 mg, 81%) as a white solid. <sup>1</sup>H NMR (500 MHz, CDCl<sub>3</sub>, 298 K)  $\delta$  (ppm) 8.26 (d,  $J$  = 7.8 Hz, 1H), 8.15 (d, 1H), 7.96 (d,  $J$  = 7.0 Hz, 1H), 7.88 (d,  $J$  = 4.9, 1H), 7.51-7.42 (m, 3H), 1.44 (s, 12H). HRMS (APCI) ( $m/z$ ): calculated for C<sub>18</sub>H<sub>19</sub>BO<sub>2</sub>S, 310.1308; found, 310.1316.

### Synthesis of 1,6-dinitro TDI:

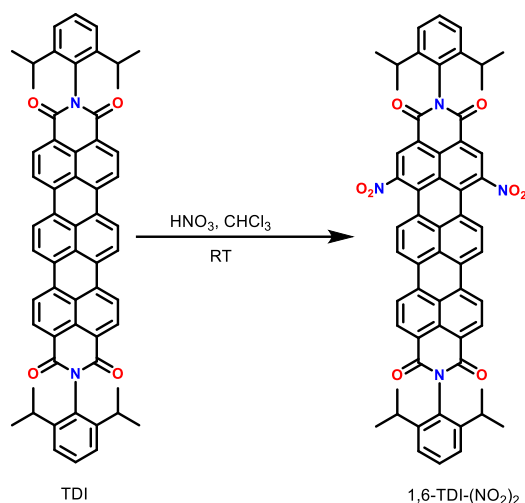

In a dry 100 mL round bottom flask, **TDI** (100 mg, 0.1198 mmol) was dissolved in 50 mL dry CHCl<sub>3</sub> and then Nitric acid (531  $\mu$ L, 11.98 mmol) was added to the solution.<sup>8</sup> The reaction mixture was stirred at room temperature for 1 hour. The excess acid was quenched by a saturated solution of KOH. The reaction mixture was washed with water 2-3 times and then the organic layer was collected over anhydrous Na<sub>2</sub>SO<sub>4</sub> using chloroform and concentrated under vacuum. The residue was subjected to neutral alumina column chromatography using DCM/hexane afforded **1,6-TDI-(NO<sub>2</sub>)<sub>2</sub>** as a greenish-blue-coloured product in 30% (33 mg) yield.

<sup>1</sup>H NMR of **1,6-TDI-(NO<sub>2</sub>)<sub>2</sub>** (500 MHz, CDCl<sub>3</sub>, 298 K)  $\delta$  (ppm) 8.95 (s, 2H), 8.82 (d, *J* = 8.0 Hz, 2H), 8.76 (d, *J* = 8.1, 2H), 8.73 (d, *J* = 8.5 Hz, 2H), 8.39 (d, *J* = 8.4 Hz, 2H), 7.56-7.49 (dt, *J* = 12.7, 7.8 Hz, 2H), 7.37 (dd, *J* = 7.5, 5.9 Hz, 4H), 2.77 (dt, *J* = 13.6, 6.8 Hz, 2H), 2.69 (dt, *J* = 13.5, 6.7 Hz, 2H), 1.20 (d, *J* = 6.7 Hz, 24H). HRMS (APCI) (*m/z*): calculated for C<sub>58</sub>H<sub>44</sub>N<sub>4</sub>O<sub>8</sub>, 925.3232; found, 925.3247.

### Synthesis of TDI-sDBT:

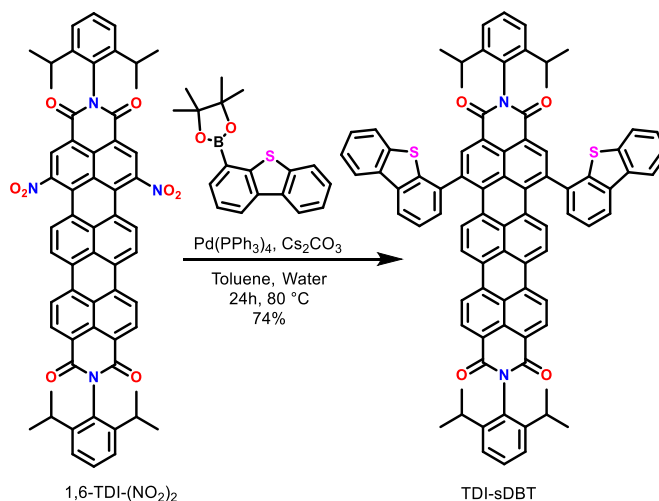

In a dry and degassed schlenk flask **1,6-TDI-(NO<sub>2</sub>)<sub>2</sub>** (0.1 mmol, 100 mg), **DBT-B** (0.2 mmol, 62 mg) and Pd(PPh<sub>3</sub>)<sub>4</sub> (Cat. amt.) were dissolved in 10 mL dry toluene and degassed with argon for 1 hour. Then an aqueous solution of Cs<sub>2</sub>CO<sub>3</sub> (0.4 mmol, 131 mg) in 0.1 mL water was added to the solution and stirred at 90 °C for 18 hours. After completion of the reaction, the reaction mixture was washed with water and the organic phase was collected over anhydrous Na<sub>2</sub>SO<sub>4</sub> using chloroform and concentrated under vacuum. Purification of residue done by silica-gel (mess 100-200) chromatography to afford **TDI-sDBT**

(88 mg, 74%) as blue solid.  $^1\text{H NMR}$  (500 MHz,  $\text{CDCl}_3$ , 298 K)  $\delta$  (ppm) 8.87 (s, 1H), 8.83 (s, 1H), 8.83 (s, 2H), 8.32 (d,  $J = 7.7$  Hz, 2H), 8.29 (d,  $J = 4.6$  Hz, 1H), 8.27 – 8.23 (m, 2H), 8.20 (d,  $J = 7.9$  Hz, 1H), 8.20 (d,  $J = 7.9$  Hz, 1H), 8.01 – 7.98 (m, 2H), 7.91 (d,  $J = 7.3$  Hz, 1H), 7.80 (t,  $J = 7.7$  Hz, 1H), 7.69 (d,  $J = 8.7$  Hz, 1H), 7.66 (s, 1H), 7.52 – 7.49 (m, 2H), 7.48 – 7.40 (m, 5H), 7.36 (d,  $J = 7.8$  Hz, 2H), 7.30 (t,  $J = 8.8$  Hz, 4H), 2.85 (dd,  $J = 12.8, 6.6$  Hz, 2H), 2.64 (dt,  $J = 13.8, 6.6$  Hz, 2H), 1.21 – 1.14 (m, 12H), 1.14 – 1.05 (m, 12H). HRMS (APCI) ( $m/z$ ): calculated for  $\text{C}_{58}\text{H}_{46}\text{N}_2\text{O}_4$ , 1199.3911; found, 1199.3899.

#### Synthesis of TDI-cDBT using $\text{FeCl}_3$ :

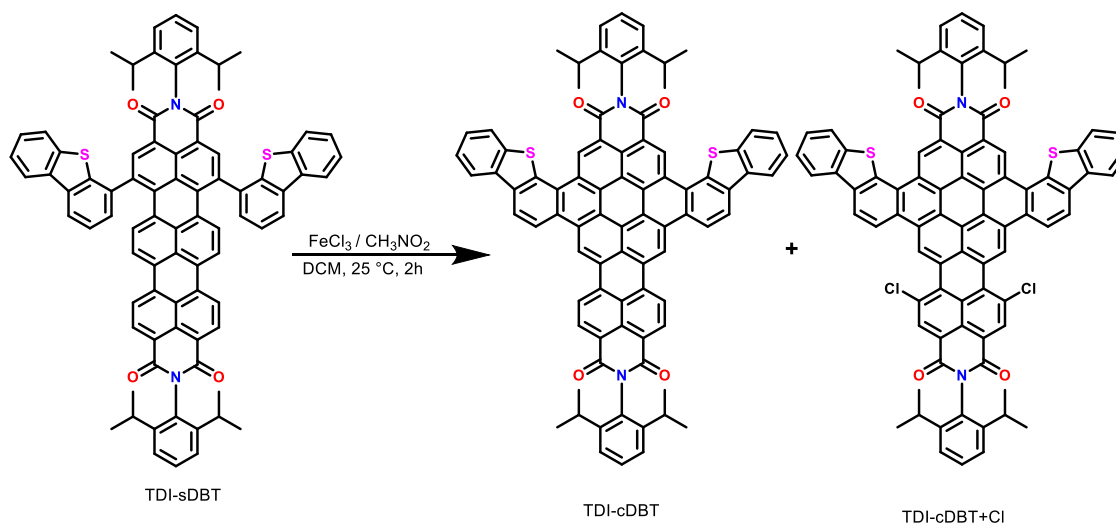

In a dry and degassed round bottom flask, **TDI-sDBT** (0.042 mmol, 50 mg) was dissolved in 20 mL methylene chloride. Then a solution of  $\text{FeCl}_3$  (1.25 mmol, 203 mg) in Nitromethane (8 mL) was added to the solution in a dropwise manner and stirred at room temperature for 2 hours. After completion of the reaction, methanol was added to the solution followed by acid water workup. After workup, the organic layer was collected in chloroform, dried over anhydrous  $\text{Na}_2\text{SO}_4$ , and concentrated under a vacuum. Next, the residue was subjected to silica gel (100-200 mesh) column chromatography. Recrystallization in DCM and methanol give the product **TDI-cDBT** as black-coloured compounds with a yield of 20 mg (40%) with a side product **TDI-cDBT+Cl** in trace amount.  $^1\text{H NMR}$  for  $^1\text{H NMR}$  for **TDI-cDBT** (500 MHz,  $\text{C}_2\text{D}_2\text{Cl}_4$ , 363 K)  $\delta$  (ppm) 10.57 (s, 2H), 9.75 (s, 2H), 9.30 (s, 2H), 8.99 (s, 2H), 8.54 (d,  $J = 7.9$  Hz, 2H), 8.43 (d,  $J = 1.47$  Hz, 2H), 7.68 (m, 6H), 7.55 (d,  $J = 7.6$  Hz, 2H), 7.50 (m, 4H), 7.34 (d,  $J = 7.8$  Hz, 2H), 2.73 (m, 4H), 1.24 (s, 24H). HRMS (APCI)  $m/z$ : Calculated for  $\text{C}_{82}\text{H}_{54}\text{N}_2\text{O}_4\text{S}_2$ , 1195.3598; found, 1195.3569.

#### Synthesis of TDI-cDBT using DDQ and $\text{CH}_3\text{SO}_3\text{H}$ :

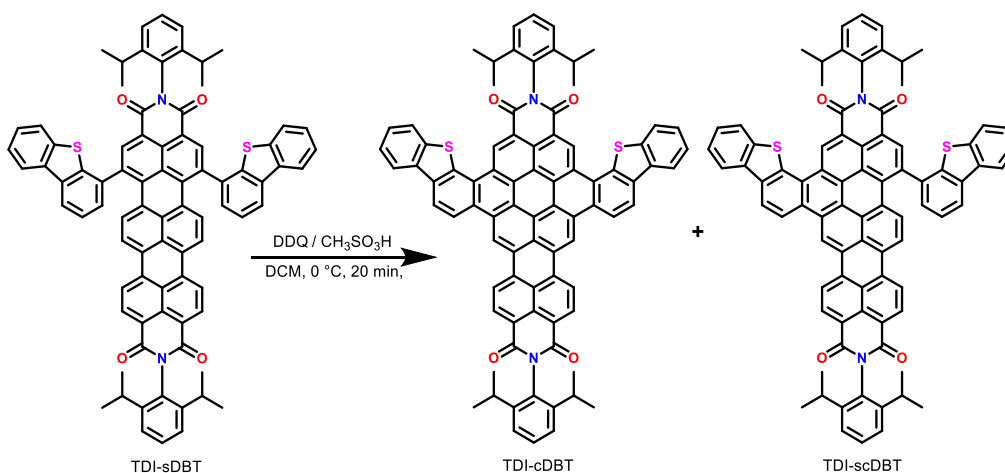

In a dry and degassed round bottom flask **TDI-sDBT** (0.016 mmol, 20 mg) and DDQ (0.083 mmol, 19 mg) was dissolved in 20 mL methylene chloride. Then 2 mL of methanesulphonic acid was added to the solution in a dropwise manner and stirred at 0 °C for 20 minutes. After completion of the reaction, a saturated solution of Na<sub>2</sub>CO<sub>3</sub> was added to quench the excess of acid. Then the reaction mixture was subjected to water workup and the organic layer was collected in chloroform and dried over anhydrous Na<sub>2</sub>SO<sub>4</sub> and concentrated under a vacuum. Next the residue was subjected to silica gel (100-200 mesh) column chromatography. Recrystallization in DCM and methanol give the product **TDI-cDBT** as black coloured compounds with yield of 12 mg (60%) with a side product **TDI-scDBT** (5 mg, 26%).

<sup>1</sup>H NMR of **TDI-scDBT** (500 MHz, CDCl<sub>3</sub>, 298 K) δ (ppm) 9.99 (br s, 1H), 9.47 (br s, 1H), 8.82 (d, *J* = 21.4 Hz, 3H), 8.60 (s, 2H), 8.31 (d, *J* = 7.4 Hz, 2H), 8.24 – 8.08 (m, 5H), 7.76 (s, 2H), 7.58 (td, *J* = 8.1, 3.3 Hz, 4H), 7.47 (d, *J* = 7.4 Hz, 3H), 7.43 – 7.36 (m, 5H), 3.08 (br s, *J* = 1.2 Hz, 2H), 2.90 – 2.72 (m, 2H), 1.23 (d, *J* = 22.5 Hz, 24H). MS (MALDI-TOF): Calculated for C<sub>82</sub>H<sub>56</sub>N<sub>2</sub>O<sub>4</sub>S<sub>2</sub>, 1197.48; found, 1197.58.

### III. Photophysical studies

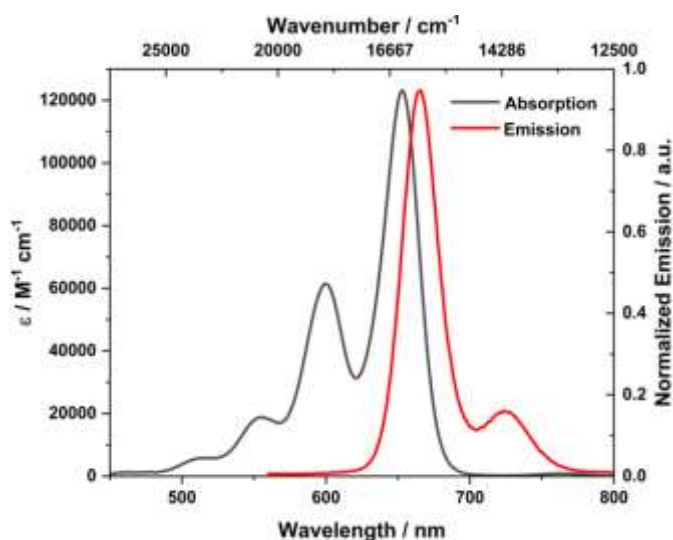

**Figure S1.** Absorption and Emission spectra of **TDI** in  $2 \times 10^{-6}$  M of toluene ( $\lambda_{\text{ex}} = 550$  nm).

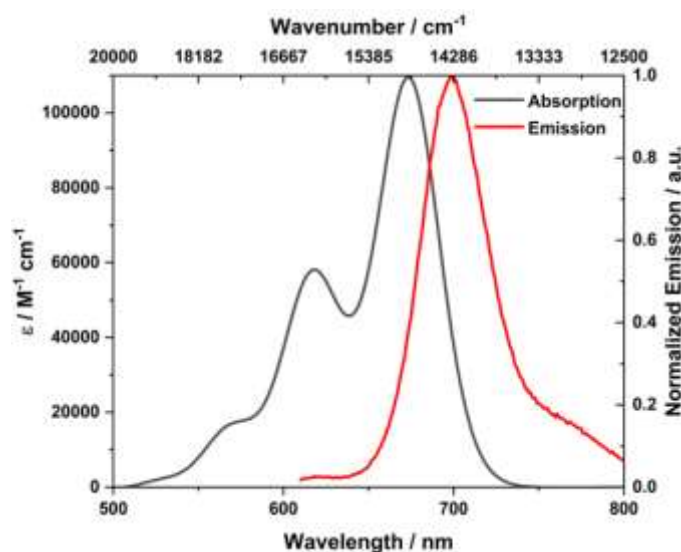

**Figure S2.** Absorption and Emission spectra of **TDI-sDBT** in  $2 \times 10^{-6}$  M of toluene ( $\lambda_{\text{ex}} = 550$  nm).

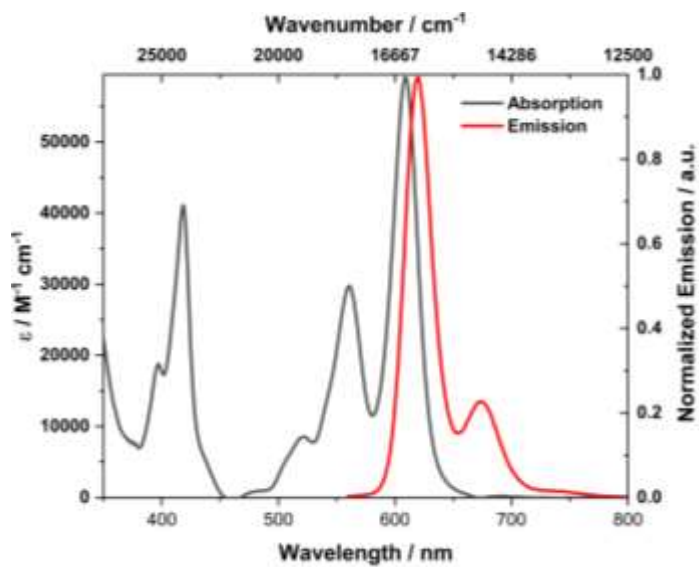

**Figure S3.** Absorption and Emission spectra of TDI-cDBT in  $2 \times 10^{-6}$  M of toluene ( $\lambda_{\text{ex}} = 550$  nm).

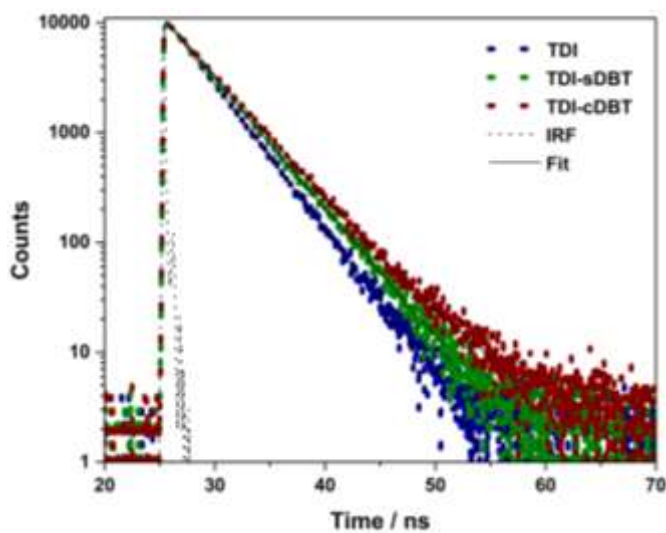

**Figure S4.** Lifetime decay profile of TDI ( $\lambda_{\text{ex}} = 509$  nm,  $\lambda_{\text{collected}} = 666$  nm), TDI-sDBT ( $\lambda_{\text{ex}} = 509$  nm,  $\lambda_{\text{collected}} = 698$  nm) and TDI-cDBT ( $\lambda_{\text{ex}} = 509$  nm,  $\lambda_{\text{collected}} = 620$  nm) in  $2 \times 10^{-6}$  M toluene solution.



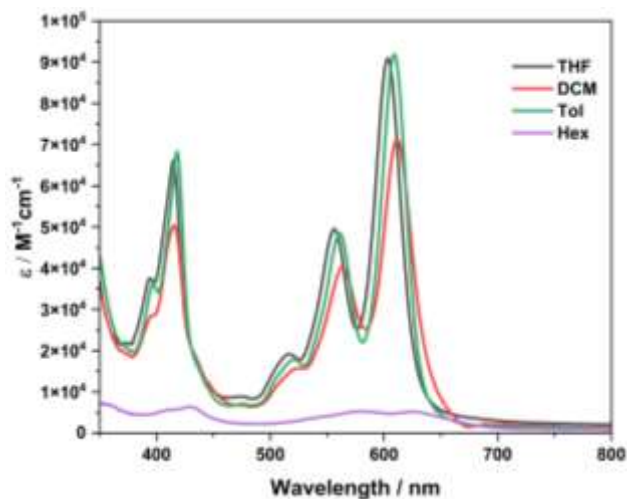

Figure S5. Solvent dependent absorption spectra of TDI-cDBT in  $2 \times 10^{-6}$  M solution.

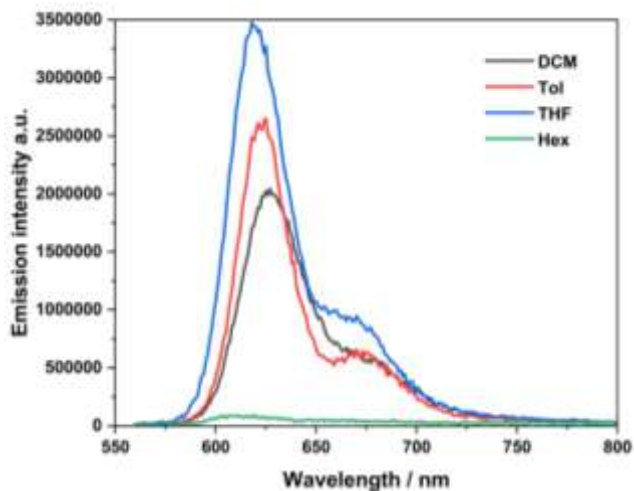

Figure S6. Solvent dependent emission spectra of TDI-cDBT in  $2 \times 10^{-6}$  M solution ( $\lambda_{\text{ex}} = 550$  nm).

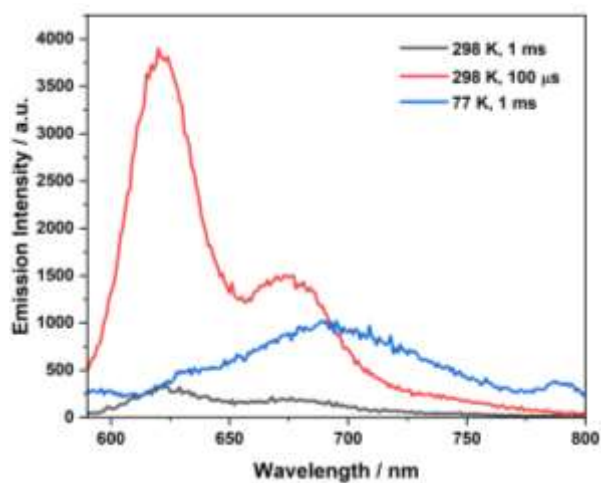

Figure S7. Delayed emission spectra of TDI-cDBT in  $2 \times 10^{-6}$  M toluene solution ( $\lambda_{\text{ex}} = 550$  nm).

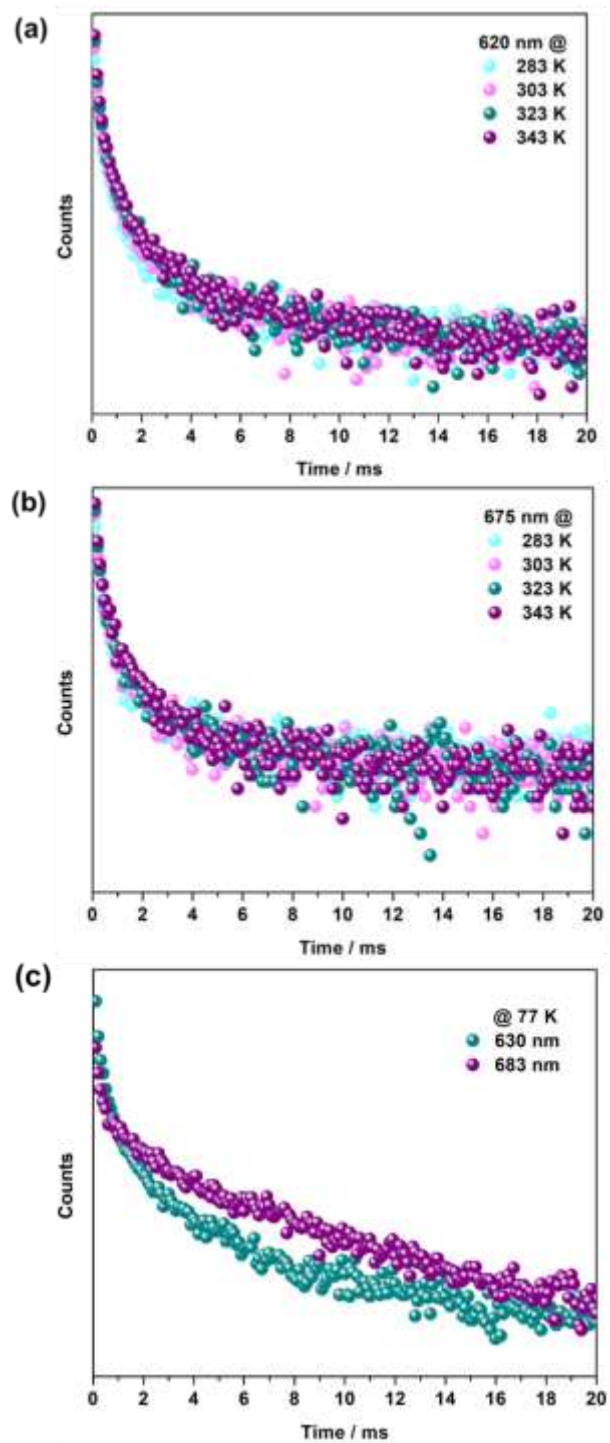

**Figure S8.** (a and b) Variable temperature; (c) 77 K transient lifetime decay profile of **TDI-cDBT** in  $2 \times 10^{-6}$  M toluene solution ( $\lambda_{\text{ex}} = 550$  nm) with initial delay of 100  $\mu\text{s}$ .

**Table S1.** Variable temperature delayed lifetime of **TDI-cDBT** in  $2 \times 10^{-6}$  M toluene solution:

| Temperature | $\tau_{av}$ [ms]<br>@ 620 nm | $\tau_{av}$ [ms]<br>@ 675 nm |
|-------------|------------------------------|------------------------------|
| 77 K        | 1.3 (630 nm)                 | 2.6 (683 nm)                 |
| 283 K       | 1.16                         | 1.11                         |
| 303 K       | 0.86                         | 0.96                         |
| 323 K       | 0.78                         | 1.10                         |
| 343 K       | 0.94                         | 0.85                         |

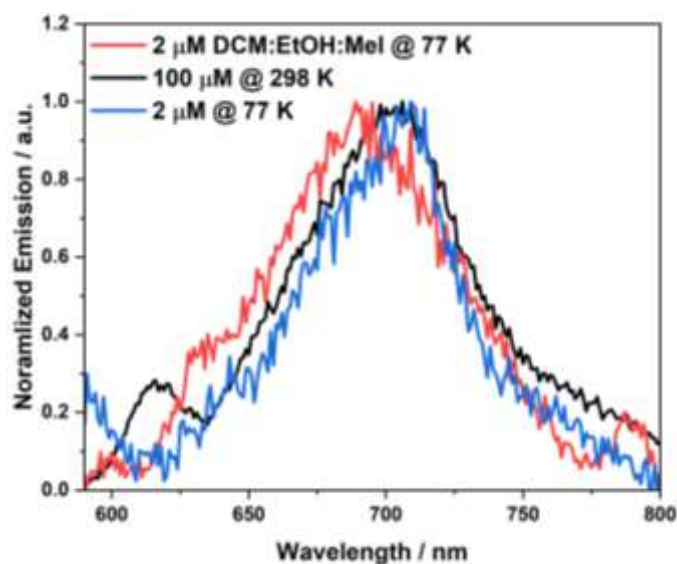

**Figure S9.** Normalized phosphorescence spectra of **TDI-cDBT** in toluene after 1 ms initial delay for  $2 \mu\text{M}$  (blue) and after  $100 \mu\text{s}$  for  $100 \mu\text{M}$  concentration (black) and in DCM:EtOH:Mel (1:1:0.1) solution after an initial delay of  $100 \mu\text{s}$  (red) ( $\lambda_{ex} = 550 \text{ nm}$ ).

**Note:** The addition of external heavy atom (DCM:EtOH:Mel glass state recorded at 77 K) experiment was conducted to distinguish the phosphorescence band from the delayed emission band.

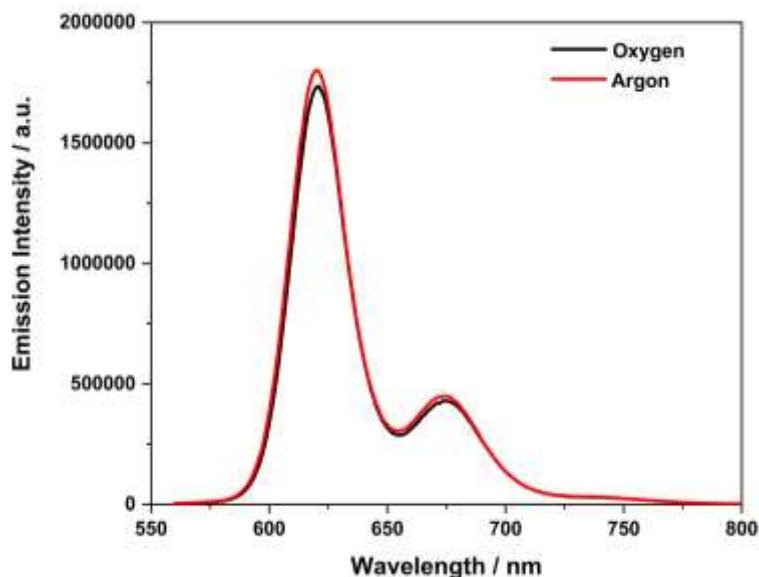

**Figure S10:** Emission spectra of **TDI-cDBT** under argon and oxygen in  $2 \times 10^{-6}$  M toluene solution ( $\lambda_{ex} = 550 \text{ nm}$ ).

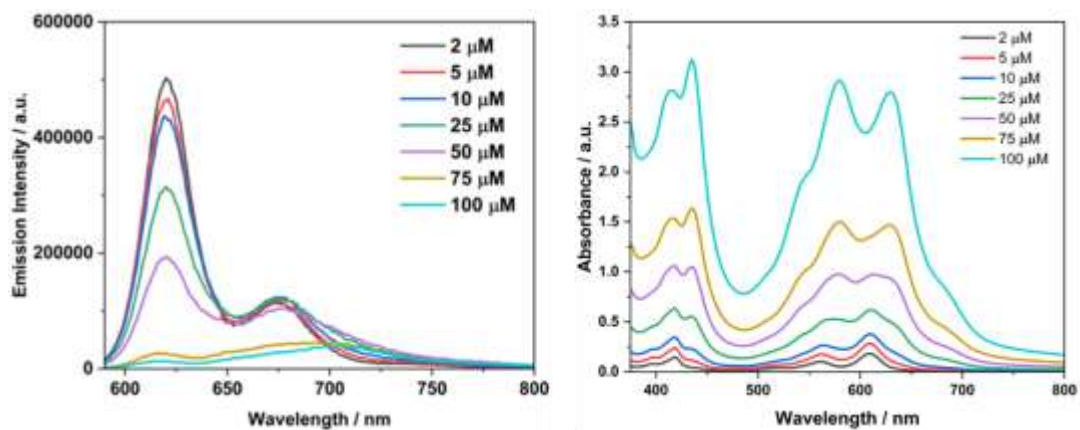

Figure S11. Concentration dependent emission (left) and absorption (right) spectra of TDI-cDBT in toluene.

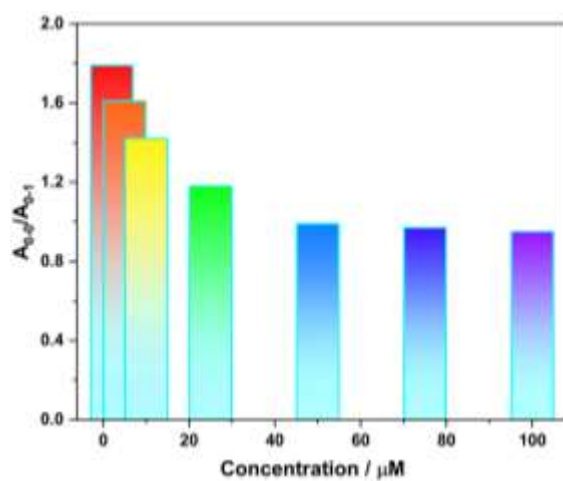

Figure S12. Absorbance ratio  $A_{0-0}/A_{0-1}$  of TDI-cDBT in toluene at variable concentration.

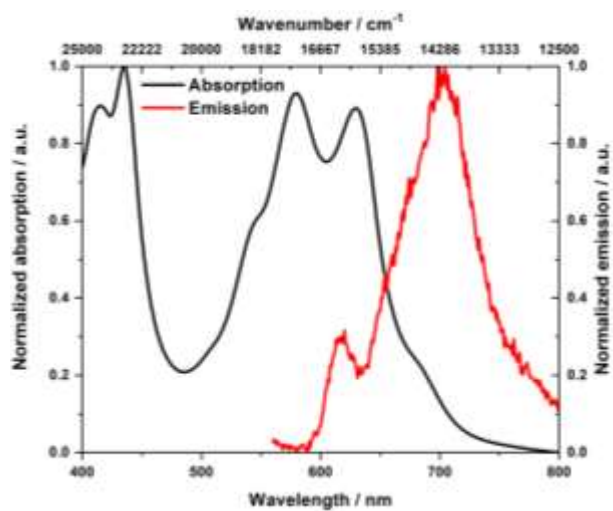

Figure S13. Absorption and Emission spectra of TDI-cDBT in  $1 \times 10^{-4}$  M of toluene ( $\lambda_{\text{ex}} = 550$  nm).

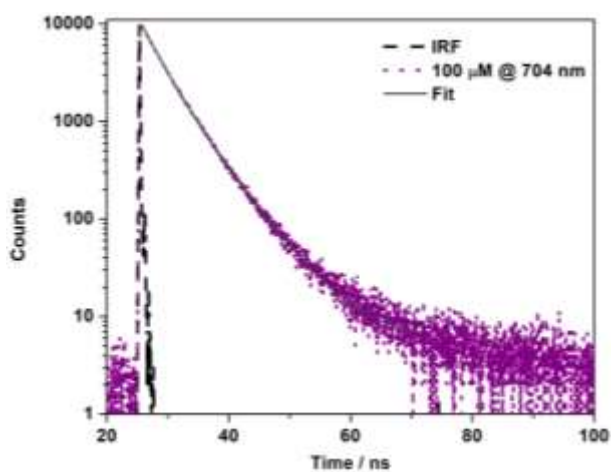

Figure S14. Fluorescence lifetime decay profile of TDI-cDBT ( $\lambda_{\text{ex}} = 509 \text{ nm}$ ) in  $1 \times 10^{-4} \text{ M}$  in toluene.

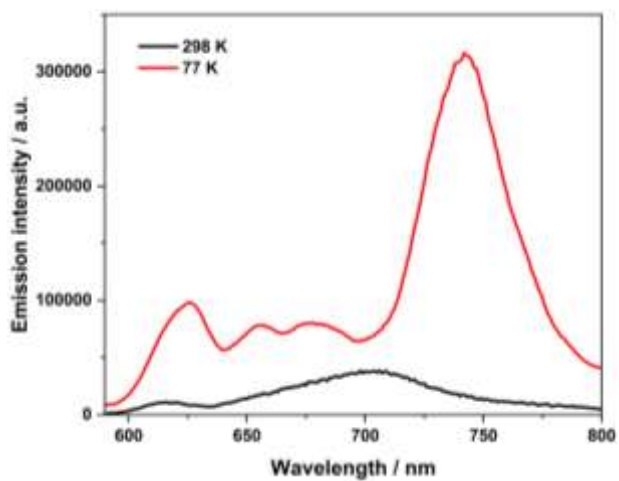

Figure S15. Variable temperature steady state emission spectra of TDI-cDBT in  $1 \times 10^{-4} \text{ M}$  in toluene.

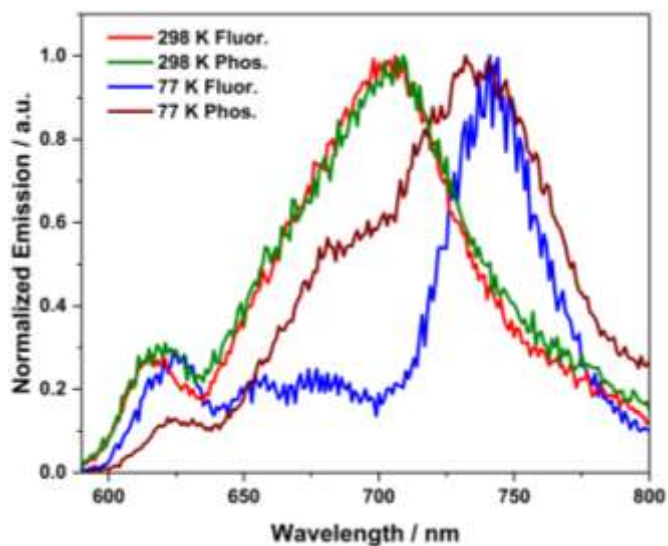

Figure S16. Normalized emission spectra of TDI-cDBT in  $1 \times 10^{-4} \text{ M}$  in toluene.

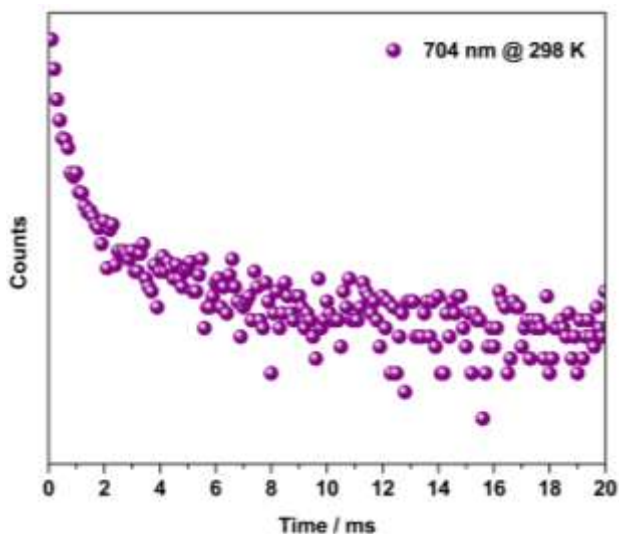

**Figure S17.** Lifetime decay profile of TDI-cDBT ( $\lambda_{\text{ex}} = 550 \text{ nm}$ ) in  $1 \times 10^{-4} \text{ M}$  toluene.

**Table S2.** Photoluminescence, lifetime and rate constants of TDI-cDBT:

| Concentration     | $\lambda_{\text{fl}}$<br>[nm] | $\lambda_{\text{phos}}$<br>[nm] | $\phi_{\text{PL}}^{\text{a}}$<br>[%] | $\phi_{\text{fl}}^{\text{b}}$<br>[%] | $\phi_{\text{d}}^{\text{c}}$<br>[%] | $\tau_{\text{fl}}$<br>[ns] | $\tau_{\text{TADF}}$<br>[ms] | $\tau_{\text{phos}}$<br>[ms] | $\Delta E_{\text{S}_1-\text{T}_1}^{\text{d}}$<br>[eV] | $k_{\text{f}}^{\text{e}}$<br>[s <sup>-1</sup> ] | $k_{\text{d}}^{\text{f}}$<br>[s <sup>-1</sup> ] | $k_{\text{r}}^{\text{g}}$<br>[s <sup>-1</sup> ] | $k_{\text{ISC}}^{\text{h}}$<br>[s <sup>-1</sup> ] | $k_{\text{RISC}}^{\text{h}}$<br>[s <sup>-1</sup> ] |
|-------------------|-------------------------------|---------------------------------|--------------------------------------|--------------------------------------|-------------------------------------|----------------------------|------------------------------|------------------------------|-------------------------------------------------------|-------------------------------------------------|-------------------------------------------------|-------------------------------------------------|---------------------------------------------------|----------------------------------------------------|
| 2 $\mu\text{M}$   | 620                           | 690                             | 88                                   | 41                                   | 47                                  | 6.0                        | 1.1                          | 6.0 <sup>k</sup>             | 0.05                                                  | $1.6 \times 10^8$                               | $9.0 \times 10^2$                               | $6.5 \times 10^7$                               | $9.4 \times 10^7$                                 | $1.76 \times 10^3$                                 |
| 100 $\mu\text{M}$ | 704                           | 732                             | -                                    | 15                                   | 6 <sup>i</sup>                      | 3.9                        | -                            | 1.8/8.0 <sup>k</sup>         | 0.04                                                  | $4 \times 10^7$                                 | 33                                              | -                                               | $1.5 \times 10^7$                                 | -                                                  |

<sup>a</sup> Total photoluminescence quantum yield from  $\text{S}_1-\text{S}_0$ ; <sup>b</sup> the prompt fluorescence quantum yield measured using integrating sphere; <sup>c</sup> delayed fluorescence quantum yield measured using integrating sphere after 100  $\mu\text{s}$  delay; <sup>d</sup> Calculated from the onset of fluorescence at 298 K and phosphorescence at 77 K in toluene solution; <sup>e</sup> radiative decay rate constant of fluorescence; <sup>f</sup> radiative decay rate constant of delayed fluorescence; <sup>g</sup> radiative decay rate constant from  $\text{S}_1-\text{S}_0$ ; <sup>h</sup> Rate constant for intersystem crossing ( $k_{\text{ISC}}$ ) and reverse intersystem crossing ( $k_{\text{RISC}}$ ) between  $\text{S}_1-\text{T}_1$ ; <sup>i</sup> phosphorescence quantum yield measured using integrating sphere after 100  $\mu\text{s}$  delay; triplet transient life time measured at <sup>j</sup> 298 K and <sup>k</sup> 77 K; fl = fluorescence, phos = phosphorescence, TADF= thermally activated delayed fluorescence.

#### IV. Computational Studies

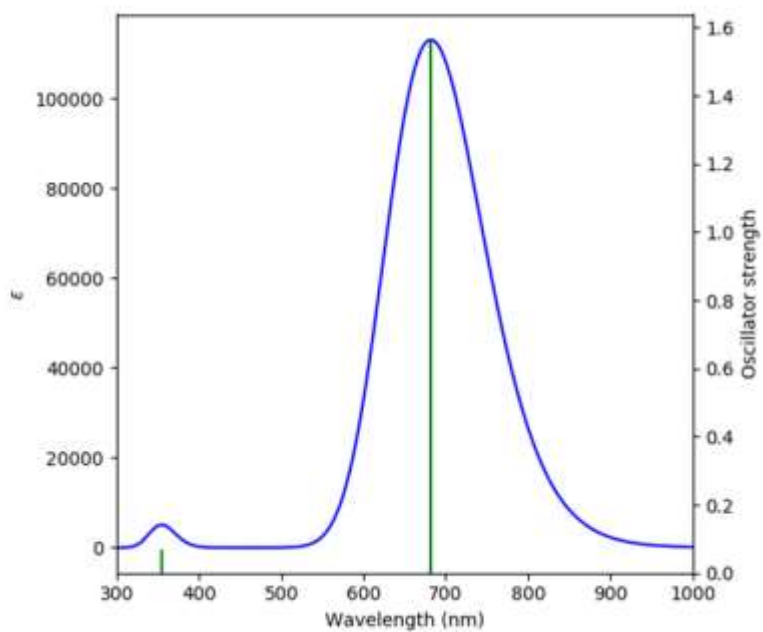

Figure S18. TDDFT predicted absorption spectra of TDI.

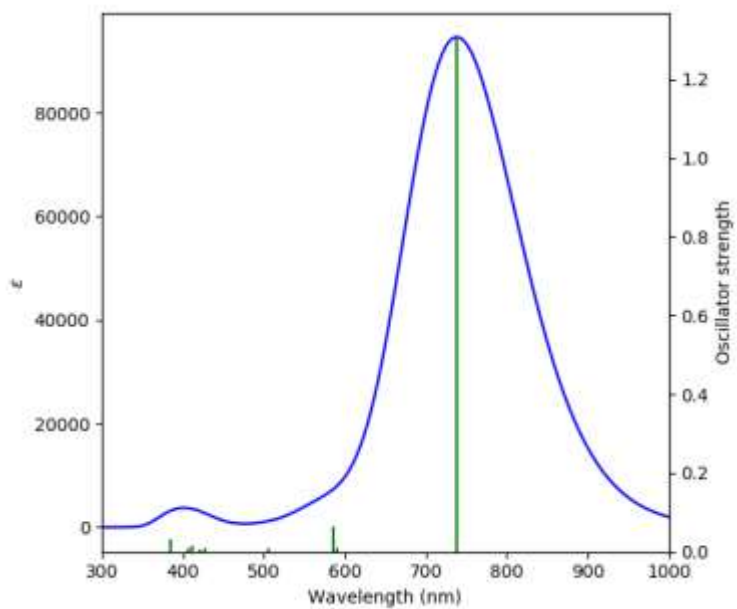

Figure S19. TDDFT predicted absorption spectra of TDI-sDBT.

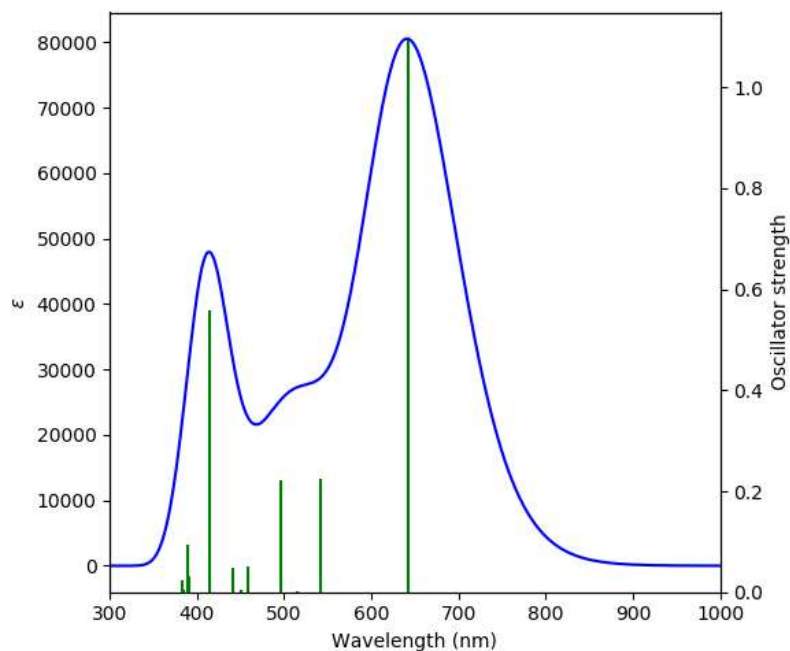

Figure S20. TDDFT predicted absorption spectra of TDI-cDBT.

Table S3. Selected TDDFT (B3LYP/6-31G\*) calculated wavelength, oscillator strength and major electronic transitions of TDI.

| Wavelength (nm) | Osc. Strength (f) | Major contributions                               |
|-----------------|-------------------|---------------------------------------------------|
| 681.906242505   | 1.5603            | HOMO->LUMO (101%)                                 |
| 460.873515026   | 0.0               | H-3->LUMO (26%), H-1->LUMO (18%), HOMO->L+1 (56%) |
| 451.130491621   | 0.0               | H-2->LUMO (99%)                                   |
| 450.409390824   | 0.0               | H-1->LUMO (80%)                                   |
| 421.127655352   | 0.0               | H-4->LUMO (96%)                                   |
| 406.50555086    | 0.0               | H-3->LUMO (64%), HOMO->L+1 (34%)                  |
| 390.046852525   | 0.0               | HOMO->L+2 (93%)                                   |
| 383.199483889   | 0.0001            | H-7->LUMO (83%), HOMO->L+3 (12%)                  |
| 368.528945136   | 0.0001            | H-9->LUMO (91%)                                   |
| 354.666150845   | 0.07              | H-11->LUMO (87%)                                  |
| 335.219253264   | 0.0001            | H-7->LUMO (11%), HOMO->L+3 (82%)                  |

Table S4. Selected TDDFT (B3LYP/6-31G\*) calculated wavelength, oscillator strength and major electronic transitions of TDI-sDBT.



| Wavelength (nm) | Osc. Strength (f) | Major contributions                               |
|-----------------|-------------------|---------------------------------------------------|
| 738.484680518   | 1.3036            | HOMO->LUMO (100%)                                 |
| 585.853579418   | 0.0637            | H-2->LUMO (99%)                                   |
| 506.471376684   | 0.0005            | H-3->LUMO (99%)                                   |
| 506.326593753   | 0.0079            | H-4->LUMO (99%)                                   |
| 475.217297862   | 0.0003            | H-8->LUMO (14%), H-6->LUMO (24%), HOMO->L+1 (51%) |
| 471.440712621   | 0.0003            | H-6->LUMO (74%), HOMO->L+1 (17%)                  |
| 439.099706092   | 0.0001            | H-9->LUMO (83%), H-8->LUMO (13%)                  |
| 426.8546203     | 0.0103            | H-9->LUMO (12%), H-8->LUMO (57%), HOMO->L+1 (24%) |
| 421.14195996    | 0.0069            | H-11->LUMO (14%), H-10->LUMO (76%)                |
| 412.044509845   | 0.0142            | HOMO->L+2 (91%)                                   |
| 406.185929145   | 0.008             | H-11->LUMO (82%), H-10->LUMO (12%)                |
| 384.268380636   | 0.0313            | H-13->LUMO (72%), H-1->L+1 (11%)                  |

**Table S5.** Selected TDDFT (B3LYP/6-31G\*) calculated wavelength, oscillator strength and major electronic transitions of **TDI-cDBT**.

| Wavelength (nm) | Osc. Strength (f) | Major contributions                               |
|-----------------|-------------------|---------------------------------------------------|
| 642.871476782   | 1.094             | HOMO->LUMO (99%)                                  |
| 541.960016664   | 0.2235            | H-1->LUMO (95%)                                   |
| 515.655435918   | 0.0007            | H-2->LUMO (98%)                                   |
| 495.679018959   | 0.221             | H-3->LUMO (98%)                                   |
| 458.657121235   | 0.0514            | H-5->LUMO (12%), H-4->LUMO (83%)                  |
| 450.376668285   | 0.0045            | H-6->LUMO (93%)                                   |
| 449.935378909   | 0.0023            | H-5->LUMO (82%), H-4->LUMO (13%)                  |
| 441.20918477    | 0.0471            | HOMO->L+1 (91%)                                   |
| 415.079320429   | 0.5571            | HOMO->L+2 (82%), H-10->LUMO (8%), H-1->LUMO (4%), |
| 390.230999031   | 0.0308            | H-9->LUMO (89%)                                   |
| 389.104296423   | 0.0931            | H-10->LUMO (78%)                                  |
| 384.470953275   | 0.0036            | H-11->LUMO (84%)                                  |
| 382.939101869   | 0.0233            | H-1->L+1 (27%), HOMO->L+3 (69%)                   |

**Note:** In **TDI-cDBT** the expansion along the molecular shorter axis stabilizes HOMO but destabilizes LUMO and thus causes hypsochromic shift. For **TDI** and **TDI-cDBT** the absorption peak occurs at 774 nm and 688 nm respectively which actually follow the trend observed in the experiments. Previous study on Perylene chromophore<sup>9</sup> also confirms the hypsochromic shift due to expansion in the molecular shorter axis.

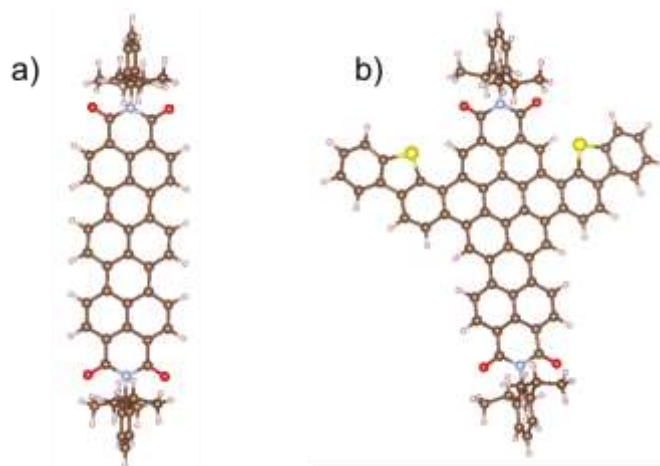

**Figure S21:** DFT optimized structures of (a) **TDI** and (b) **TDI-cDBT**.

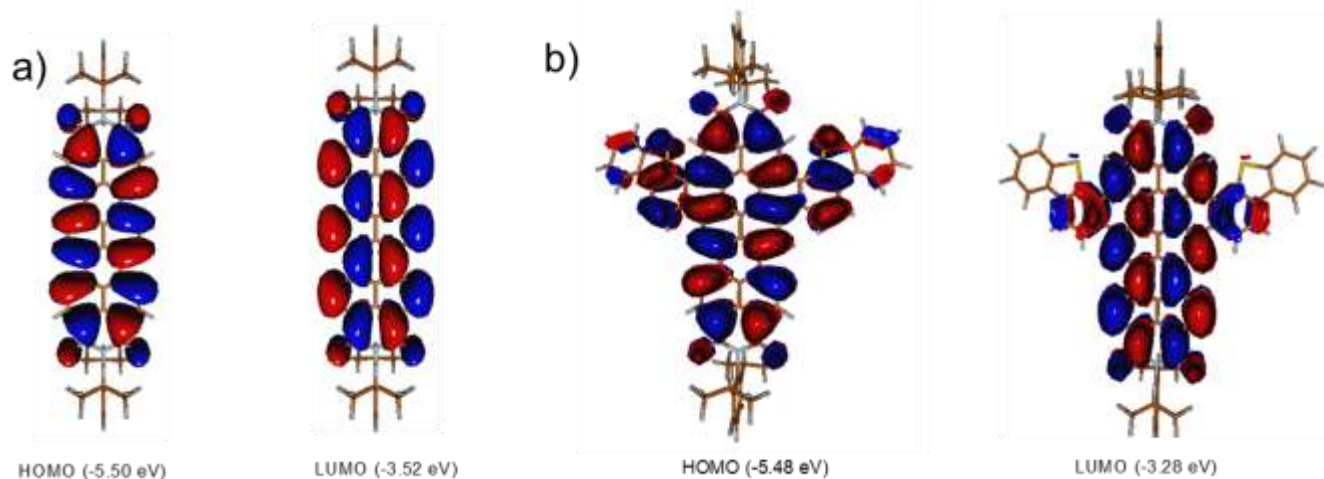

**Figure S22:** Frontier molecular orbital (FMO) pictures of (a) **TDI** and (b) **TDI-cDBT**.

**Table S6.** HOMO-LUMO gap and ST gap of **TDI** and **TDI-cDBT** at SF-TDDFT/UB3LYP/6-31G(d,p) level of theory.

| System   | HOMO-LUMO gap (eV) | ST gap (eV) |
|----------|--------------------|-------------|
| TDI      | 1.98               | 1.25        |
| TDI-cDBT | 2.20               | 1.54        |

**Note:** For linear acenes, increase in conjugation with system size causes the decrease in HOMO-LUMO gap as well as Singlet-Triplet gap ( $S_0T_1$  gap).<sup>10-14</sup> In case of **TDI** conjugation along the molecular long axis reduces the HOMO-LUMO gap<sup>10</sup> as well as ST gap but in **TDI-cDBT** the expansion along the shorter axis breaks the conjugation. As a result, **TDI-cDBT** has a larger ST gap than the **TDI**. The reduction of conjugation of **TDI-cDBT** can be found from the plotting of the average bond length of the rings as shown in figure S23.

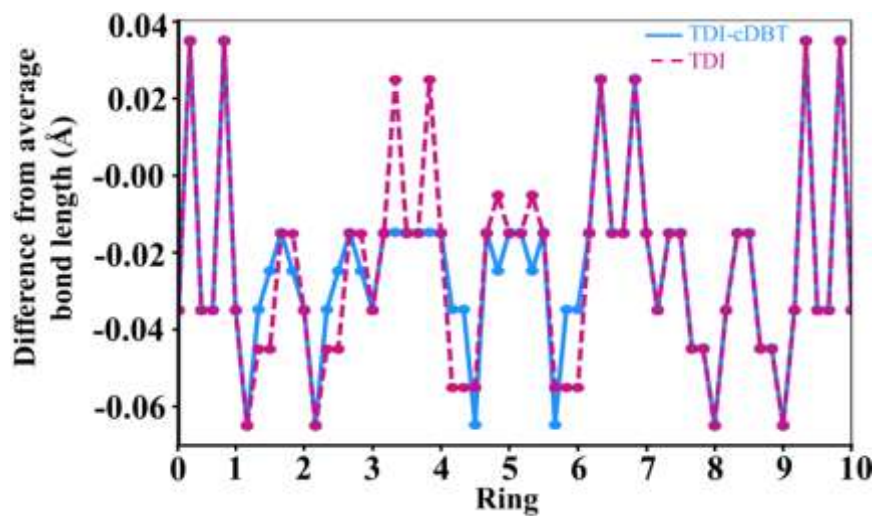

**Figure S23:** Plot of average bond length of each ring along the molecular large axis of **TDI** and **TDI-cDBT**.

**Table S7.** Spin-orbit coupling of TDI and TDI-cDBT.

| System   | Energy Transition              | SOC (cm <sup>-1</sup> ) |
|----------|--------------------------------|-------------------------|
| TDI      | S <sub>1</sub> -T <sub>1</sub> | 0.02                    |
|          | T <sub>1</sub> -S <sub>0</sub> | 0.95                    |
| TDI-cDBT | S <sub>1</sub> -T <sub>1</sub> | 0.22                    |
|          | T <sub>1</sub> -S <sub>0</sub> | 0.58                    |

**Note:** The S<sub>1</sub> state is the first optically bright state for both the systems and the spin-orbit coupling (SOC) between S<sub>1</sub> and T<sub>1</sub> state is 0.02 cm<sup>-1</sup> and 0.22 cm<sup>-1</sup> for TDI and TDI-cDBT respectively.

**Table S8.** Low-lying excited states of TDI and TDI-cDBT at TDDFT/UB3LYP/6-31G(d,p) level of theory.

| System   | State          | Energy (eV) |
|----------|----------------|-------------|
| TDI      | T <sub>1</sub> | 0.86        |
|          | S <sub>1</sub> | 1.95        |
|          | T <sub>2</sub> | 1.98        |
| TDI-cDBT | T <sub>1</sub> | 1.21        |
|          | S <sub>1</sub> | 2.02        |
|          | T <sub>2</sub> | 2.07        |
|          | T <sub>3</sub> | 2.11        |

**Table S9.** Cartesian coordinates of the DFT optimized structures:

TDI:

| Symbol | X        | Y         | Z         |
|--------|----------|-----------|-----------|
| O      | 7.863988 | 0.18604   | 2.282613  |
| O      | 7.863985 | -0.18603  | -2.28262  |
| N      | 7.873506 | 3.20E-05  | -3.00E-06 |
| C      | 0.719379 | -1.83E-04 | 2.00E-05  |
| C      | 5.030776 | -9.70E-05 | 8.00E-06  |
| C      | 1.433046 | 0.102039  | 1.236557  |

|   |          |           |           |
|---|----------|-----------|-----------|
| C | 5.741449 | -0.09986  | -1.22032  |
| C | 3.646484 | 0.198191  | 2.421139  |
| C | 3.601009 | -1.43E-04 | 1.20E-05  |
| C | 2.900343 | 0.101862  | 1.241745  |
| C | 5.043513 | -0.19749  | -2.41312  |
| H | 5.606321 | -0.27283  | -3.33708  |
| C | 3.646483 | -0.19848  | -2.42111  |
| C | 5.741449 | 0.099706  | 1.22033   |
| C | 2.900341 | -0.1022   | -1.24171  |
| C | 5.043515 | 0.197283  | 2.413139  |
| H | 5.606323 | 0.272659  | 3.337093  |
| C | 9.325994 | 1.20E-04  | -8.00E-06 |
| C | 7.222796 | 0.101376  | 1.244716  |
| C | 0.695246 | -0.20053  | -2.41523  |
| H | 1.198423 | -0.27979  | -3.37077  |
| C | -0.69526 | -0.20097  | -2.4152   |
| H | -1.19844 | -0.28043  | -3.37071  |
| C | 7.222794 | -0.10142  | -1.24471  |
| C | 1.433043 | -0.10245  | -1.23651  |
| C | 10.00302 | -1.22859  | 0.087292  |
| C | 10.00286 | 1.228917  | -0.08731  |
| C | 12.09794 | 2.95E-04  | -1.70E-05 |
| H | 13.18425 | 3.63E-04  | -2.20E-05 |
| C | 9.272112 | -2.56285  | 0.181426  |
| H | 8.197069 | -2.36136  | 0.173831  |
| C | 11.40213 | 1.202153  | -0.08498  |
| H | 11.95246 | 2.135984  | -0.15068  |
| C | 11.40228 | -1.20165  | 0.084949  |
| H | 11.95273 | -2.13541  | 0.150644  |
| C | 9.271789 | 2.56308   | -0.18145  |
| H | 8.196771 | 2.361464  | -0.17384  |
| C | 9.571174 | 3.453708  | 1.039046  |
| H | 9.311165 | 2.938307  | 1.968155  |
| H | 8.993942 | 4.383401  | 0.985641  |
| H | 10.6315  | 3.724073  | 1.087958  |
| C | 9.584989 | -3.28264  | 1.506642  |
| H | 10.64552 | -3.54648  | 1.579913  |
| H | 9.006665 | -4.2099   | 1.584474  |
| H | 9.335813 | -2.64746  | 2.361685  |
| C | 9.571589 | -3.45342  | -1.03909  |
| H | 9.3115   | -2.93803  | -1.96819  |

|   |          |           |           |
|---|----------|-----------|-----------|
| H | 8.994475 | -4.38318  | -0.98569  |
| H | 10.63195 | -3.72365  | -1.08802  |
| C | 9.584559 | 3.282891  | -1.50668  |
| H | 10.64506 | 3.546859  | -1.57997  |
| H | 9.006123 | 4.210079  | -1.58452  |
| H | 9.335446 | 2.647665  | -2.36171  |
| O | -7.86399 | -0.19128  | -2.28218  |
| O | -7.864   | 0.191522  | 2.282158  |
| N | -7.8735  | 3.40E-05  | -4.00E-06 |
| C | -0.71938 | -1.74E-04 | 1.90E-05  |
| C | -5.03078 | -5.80E-05 | 1.00E-05  |
| C | -1.43305 | -0.10319  | -1.23645  |
| C | -5.74145 | 0.102411  | 1.220115  |
| C | -3.64648 | -0.20316  | -2.42073  |
| C | -3.60102 | -1.19E-04 | 1.40E-05  |
| C | -2.90035 | -0.10408  | -1.24156  |
| C | -5.04351 | 0.202524  | 2.412708  |
| H | -5.60632 | 0.28016   | 3.336478  |
| C | -3.64648 | 0.203017  | 2.420751  |
| C | -5.74145 | -0.10247  | -1.2201   |
| C | -2.90035 | 0.103809  | 1.24159   |
| C | -5.04351 | -0.2026   | -2.4127   |
| H | -5.60632 | -0.28015  | -3.33647  |
| C | -9.32599 | 8.90E-05  | -1.10E-05 |
| C | -7.22279 | -0.10431  | -1.24448  |
| C | -0.69525 | 0.200399  | 2.415256  |
| H | -1.19844 | 0.279673  | 3.370783  |
| C | 0.695255 | 0.199968  | 2.415288  |
| H | 1.198435 | 0.279085  | 3.370837  |
| C | -7.2228  | 0.10439   | 1.244472  |
| C | -1.43305 | 0.102807  | 1.236494  |
| C | -10.0029 | 1.228378  | -0.09388  |
| C | -10.003  | -1.22816  | 0.093859  |
| C | -12.0979 | 1.74E-04  | -4.00E-06 |
| H | -13.1842 | 2.07E-04  | 1.00E-06  |
| C | -9.27186 | 2.562007  | -0.19561  |
| H | -8.19683 | 2.360687  | -0.18395  |
| C | -11.4022 | -1.20127  | 0.091507  |
| H | -11.9527 | -2.13466  | 0.162388  |
| C | -11.4022 | 1.201572  | -0.09152  |
| H | -11.9525 | 2.135004  | -0.16239  |

|   |          |          |          |
|---|----------|----------|----------|
| C | -9.27202 | -2.56183 | 0.195596 |
| H | -8.19697 | -2.36057 | 0.183988 |
| C | -9.57438 | -3.46118 | -1.01773 |
| H | -9.31656 | -2.95258 | -1.9512  |
| H | -8.99703 | -4.39047 | -0.95899 |
| H | -10.6348 | -3.73193 | -1.06224 |
| C | -9.58175 | 3.272094 | -1.52678 |
| H | -10.6422 | 3.535031 | -1.60437 |
| H | -9.00349 | 4.198933 | -1.61002 |
| H | -9.3304  | 2.630683 | -2.3765  |
| C | -9.57422 | 3.4614   | 1.017675 |
| H | -9.31647 | 2.952808 | 1.951168 |
| H | -8.99682 | 4.390659 | 0.958939 |
| H | -10.6346 | 3.732216 | 1.062141 |
| C | -9.582   | -3.27194 | 1.526727 |
| H | -10.6425 | -3.53481 | 1.604276 |
| H | -9.00381 | -4.19881 | 1.609966 |
| H | -9.33065 | -2.63057 | 2.376486 |
| H | 3.147441 | -0.27681 | -3.3789  |
| H | 3.147442 | 0.276491 | 3.378923 |
| H | -3.14743 | -0.28354 | -3.37833 |
| H | -3.14744 | 0.283459 | 3.378359 |

TDI-sDBT:

| Symbol | X       | Y       | Z       |
|--------|---------|---------|---------|
| C      | -4.4795 | 2.39911 | -0.7607 |
| C      | -3.0844 | 2.44153 | -0.5771 |
| C      | -2.3137 | 1.25709 | -0.7266 |
| C      | -3.0116 | -0.001  | -0.8197 |
| C      | -4.4365 | -0.0014 | -0.9439 |
| C      | -5.1526 | 1.21548 | -0.9846 |
| C      | -2.3133 | -1.2586 | -0.7256 |
| C      | -3.0832 | -2.4433 | -0.574  |
| C      | -4.4784 | -2.4018 | -0.7573 |
| C      | -5.1521 | -1.2187 | -0.9828 |
| C      | -0.844  | 1.24294 | -0.7905 |
| C      | -0.1321 | -0.0005 | -0.7796 |
| C      | -0.8437 | -1.2441 | -0.7906 |
| C      | -0.0986 | 2.4113  | -0.9742 |

|   |         |         |         |
|---|---------|---------|---------|
| C | 1.29141 | 2.41112 | -1.0061 |
| C | 2.02841 | 1.23552 | -0.8866 |
| C | 1.30981 | -0.0004 | -0.8303 |
| C | 2.02858 | -1.2362 | -0.8877 |
| C | 1.29174 | -2.4118 | -1.0079 |
| C | -0.0983 | -2.4123 | -0.9754 |
| C | 3.49555 | 1.24328 | -0.8678 |
| C | 4.1992  | -0.0002 | -0.8659 |
| C | 3.49573 | -1.2437 | -0.8693 |
| C | 4.23834 | 2.42956 | -0.835  |
| C | 5.63681 | 2.42342 | -0.8244 |
| C | 6.3384  | 1.22643 | -0.8337 |
| C | 5.62951 | -7E-05  | -0.8462 |
| C | 6.33861 | -1.2265 | -0.8354 |
| C | 5.63721 | -2.4236 | -0.8277 |
| C | 4.23874 | -2.4299 | -0.8383 |
| C | 7.81932 | 1.2481  | -0.8193 |
| N | 8.47221 | 0.00015 | -0.8165 |
| C | 7.81953 | -1.2479 | -0.821  |
| C | -6.6219 | -1.2449 | -1.1732 |
| N | -7.2552 | -0.0024 | -1.3734 |
| C | -6.6224 | 1.24072 | -1.1751 |
| C | -8.6989 | -0.0028 | -1.5631 |
| C | 9.92689 | 0.00026 | -0.805  |
| C | 10.594  | -0.0003 | 0.43367 |
| C | 11.9946 | -0.0002 | 0.41711 |
| C | 12.7006 | 0.00048 | -0.7835 |
| C | 12.0133 | 0.001   | -1.9949 |
| C | 10.6131 | 0.00091 | -2.0332 |
| C | -9.5172 | -0.0021 | -0.417  |
| C | -10.906 | -0.0026 | -0.6    |
| C | -11.461 | -0.0037 | -1.8748 |
| C | -10.627 | -0.0044 | -2.9906 |
| C | -9.2295 | -0.004  | -2.87   |
| O | -7.2652 | -2.2859 | -1.1748 |
| O | -7.2662 | 2.28147 | -1.1785 |
| O | 8.46347 | -2.2899 | -0.8138 |
| O | 8.46309 | 2.29016 | -0.8108 |
| C | -8.9565 | -0.0008 | 1.00205 |

|   |         |         |         |
|---|---------|---------|---------|
| C | -9.3618 | 1.27404 | 1.76914 |
| C | -9.3615 | -1.2744 | 1.7714  |
| C | -8.4257 | -0.0049 | -4.1756 |
| C | -7.5863 | 1.26682 | -4.4118 |
| C | -7.5856 | -1.2764 | -4.4097 |
| C | 9.89452 | 0.00154 | -3.3783 |
| C | 10.2085 | 1.27562 | -4.1881 |
| C | 10.2088 | -1.2716 | -4.1894 |
| C | 9.85467 | -0.001  | 1.76749 |
| C | 10.1563 | -1.275  | 2.58198 |
| C | 10.1561 | 1.27227 | 2.58324 |
| C | -2.5706 | -3.786  | -0.1531 |
| C | -2.7034 | -4.9001 | -0.9924 |
| C | -2.0559 | -4.0095 | 1.13756 |
| C | -1.6517 | -5.2955 | 1.56791 |
| C | -1.7738 | -6.3828 | 0.68858 |
| C | -2.3026 | -6.1805 | -0.5821 |
| S | -1.8517 | -2.7863 | 2.39552 |
| C | -1.2139 | -3.9963 | 3.51199 |
| C | -1.1623 | -5.2869 | 2.93856 |
| C | -0.7941 | -3.7618 | 4.82519 |
| C | -0.3151 | -4.8362 | 5.57216 |
| C | -0.2562 | -6.1267 | 5.01801 |
| C | -0.6765 | -6.3546 | 3.71109 |
| C | -0.8045 | 3.77102 | 4.8232  |
| C | -0.3271 | 4.84708 | 5.56897 |
| C | -1.2222 | 4.00297 | 3.50889 |
| C | -1.1703 | 5.29247 | 2.93317 |
| C | -0.6862 | 6.36184 | 3.70451 |
| C | -0.2679 | 6.1365  | 5.01252 |
| S | -1.8577 | 2.79059 | 2.39364 |
| C | -2.0604 | 4.01144 | 1.13311 |
| C | -1.6574 | 5.29837 | 1.56171 |
| C | -2.5729 | 3.78533 | -0.158  |
| C | -2.7047 | 4.89776 | -0.9997 |
| C | -2.3051 | 6.17905 | -0.5911 |
| C | -1.7785 | 6.38398 | 0.68011 |
| H | -5.0559 | 3.31535 | -0.6927 |
| H | -5.0544 | -3.3181 | -0.6878 |



|   |         |         |         |
|---|---------|---------|---------|
| H | -0.5972 | 3.35777 | -1.1075 |
| H | 1.7902  | 3.36262 | -1.1435 |
| H | 1.79064 | -3.3632 | -1.1462 |
| H | -0.5969 | -3.3587 | -1.109  |
| H | 3.73561 | 3.38826 | -0.8052 |
| H | 6.19464 | 3.35352 | -0.8027 |
| H | 6.19518 | -3.3536 | -0.8074 |
| H | 3.73619 | -3.3888 | -0.8098 |
| H | 12.5395 | -0.0006 | 1.35651 |
| H | 13.787  | 0.00057 | -0.7751 |
| H | 12.5727 | 0.00149 | -2.9258 |
| H | -11.559 | -0.002  | 0.26807 |
| H | -12.54  | -0.004  | -2.0018 |
| H | -11.066 | -0.0053 | -3.9848 |
| H | -7.8647 | -0.0007 | 0.94205 |
| H | -8.8915 | 1.28593 | 2.75911 |
| H | -9.051  | 2.17262 | 1.22799 |
| H | -10.446 | 1.32409 | 1.91662 |
| H | -8.8912 | -1.2844 | 2.76138 |
| H | -9.0505 | -2.1738 | 1.23185 |
| H | -10.446 | -1.3244 | 1.91899 |
| H | -9.1926 | -0.0058 | -4.9601 |
| H | -7.2608 | 1.30019 | -5.4581 |
| H | -8.1609 | 2.17326 | -4.2007 |
| H | -6.687  | 1.29017 | -3.7913 |
| H | -7.26   | -1.3113 | -5.4559 |
| H | -8.1596 | -2.1829 | -4.1971 |
| H | -6.6861 | -1.2982 | -3.7893 |
| H | 8.81728 | 0.00132 | -3.1875 |
| H | 9.62947 | 1.2867  | -5.1187 |
| H | 9.9613  | 2.17557 | -3.6168 |
| H | 11.2696 | 1.32666 | -4.4567 |
| H | 9.96179 | -2.1722 | -3.6191 |
| H | 11.2699 | -1.3221 | -4.4582 |
| H | 9.62975 | -1.2818 | -5.12   |
| H | 8.78052 | -0.001  | 1.56001 |
| H | 9.5627  | -1.2864 | 3.50337 |
| H | 9.9183  | -2.175  | 2.00676 |
| H | 11.2131 | -1.3258 | 2.86729 |

|   |         |         |         |
|---|---------|---------|---------|
| H | 9.56246 | 1.28257 | 3.50465 |
| H | 9.91787 | 2.17269 | 2.00891 |
| H | 11.2128 | 1.32296 | 2.86859 |
| H | -3.1134 | -4.7591 | -1.9884 |
| H | -1.4691 | -7.3765 | 1.00274 |
| H | -2.4119 | -7.018  | -1.2642 |
| H | -0.8399 | -2.7659 | 5.25492 |
| H | 0.01523 | -4.6723 | 6.59349 |
| H | 0.11942 | -6.9518 | 5.6152  |
| H | -0.6294 | -7.3549 | 3.29063 |
| H | -0.8505 | 2.77589 | 5.25471 |
| H | 0.00161 | 4.68516 | 6.59113 |
| H | -0.6387 | 7.36143 | 3.28227 |
| H | 0.10647 | 6.9629  | 5.6088  |
| H | -3.1131 | 4.7547  | -1.996  |
| H | -2.4135 | 7.01523 | -1.2749 |
| H | -1.4746 | 7.37841 | 0.99289 |

**TDI-cDBT:**

| <b>Symbol</b> | <b>X</b> | <b>Y</b> | <b>Z</b> |
|---------------|----------|----------|----------|
| C             | -3.9073  | -2.4201  | 0.17285  |
| C             | -2.5199  | -2.4739  | -0.0992  |
| C             | -1.7983  | -1.245   | -0.1097  |
| C             | -2.494   | 0.00011  | -0.0139  |
| C             | -3.8958  | 0.00001  | 0.18565  |
| C             | -4.5832  | -1.2267  | 0.3127   |
| C             | -1.7983  | 1.24535  | -0.1082  |
| C             | -2.5199  | 2.47421  | -0.0962  |
| C             | -3.9072  | 2.42018  | 0.17612  |
| C             | -4.5831  | 1.22661  | 0.31456  |
| C             | -0.3682  | -1.2387  | -0.1709  |
| C             | 0.34789  | 0.00021  | -0.1496  |

|   |         |         |         |
|---|---------|---------|---------|
| C | -0.3682 | 1.23912 | -0.1692 |
| C | 0.33737 | -2.4646 | -0.1953 |
| C | 1.74495 | -2.4221 | -0.1274 |
| C | 2.47307 | -1.2443 | -0.0771 |
| C | 1.77106 | 0.00023 | -0.1069 |
| C | 2.47289 | 1.24478 | -0.0729 |
| C | 1.7448  | 2.42257 | -0.1226 |
| C | 0.33731 | 2.46505 | -0.1921 |
| C | 3.94312 | -1.2482 | 1.3E-05 |
| C | 4.64081 | 0.0002  | 0.04173 |
| C | 3.94274 | 1.24865 | 0.00798 |
| C | 4.69002 | -2.4284 | 0.03675 |
| C | 6.08557 | -2.42   | 0.11223 |
| C | 6.78078 | -1.2236 | 0.15384 |
| C | 6.06946 | 0.00017 | 0.1196  |
| C | 6.78028 | 1.22389 | 0.16361 |
| C | 6.08458 | 2.42039 | 0.13181 |
| C | 4.68908 | 2.42877 | 0.05542 |
| C | 8.26001 | -1.2483 | 0.23393 |
| N | 8.90985 | 0.00012 | 0.27438 |
| C | 8.25949 | 1.24857 | 0.24407 |
| C | -6.0365 | 1.25084 | 0.61204 |
| N | -6.6724 | -0.0003 | 0.73865 |
| C | -6.0366 | -1.2513 | 0.6098  |
| C | -8.0961 | -0.0005 | 1.0279  |
| C | 10.3601 | 0.00017 | 0.35288 |
| C | 11.1027 | 0.00345 | -0.8406 |
| C | 12.4985 | 0.00342 | -0.738  |
| C | 13.128  | 0.00037 | 0.50275 |
| C | 12.3681 | -0.0028 | 1.66825 |
| C | 10.9695 | -0.003  | 1.61949 |
| C | -9.0046 | 0.00734 | -0.0446 |
| C | -10.37  | 0.00725 | 0.26034 |
| C | -10.813 | -0.0008 | 1.57956 |
| C | -9.8909 | -0.0087 | 2.62187 |
| C | -8.5143 | -0.0085 | 2.36982 |
| O | -6.6665 | 2.28976 | 0.74342 |
| O | -6.6668 | -2.2904 | 0.73948 |
| O | 8.89973 | 2.28981 | 0.28303 |

|   |         |         |         |
|---|---------|---------|---------|
|   |         |         |         |
| O | 8.90066 | -2.2896 | 0.26425 |
| C | -8.5546 | 0.01672 | -1.5009 |
| C | -9.0222 | -1.2501 | -2.2416 |
| C | -9.0084 | 1.3012  | -2.2196 |
| C | -7.5319 | -0.0184 | 3.53521 |
| C | -7.6748 | 1.24704 | 4.40148 |
| C | -7.6681 | -1.3044 | 4.37195 |
| C | 10.1671 | -0.0064 | 2.91548 |
| C | 10.43   | -1.2837 | 3.7352  |
| C | 10.428  | 1.26779 | 3.74051 |
| C | 10.4451 | 0.00664 | -2.2157 |
| C | 10.7957 | 1.28326 | -3.0028 |
| C | 10.7931 | -1.2681 | -3.0071 |
| C | -1.8152 | 3.73107 | -0.3225 |
| C | -0.3861 | 3.72512 | -0.3149 |
| C | -2.4573 | 4.98165 | -0.5822 |
| C | -1.725  | 6.17411 | -0.7444 |
| C | -0.3221 | 6.14177 | -0.6604 |
| C | 0.32169 | 4.94518 | -0.4683 |
| S | -4.1899 | 5.28097 | -0.8427 |
| C | -3.9133 | 6.99317 | -1.1312 |
| C | -2.5489 | 7.33032 | -1.0389 |
| C | -4.8911 | 7.94986 | -1.4158 |
| C | -4.4865 | 9.26647 | -1.6119 |
| C | -3.1303 | 9.6225  | -1.5244 |
| C | -2.1638 | 8.66593 | -1.2413 |
| C | -4.8908 | -7.949  | -1.4221 |
| C | -4.4861 | -9.2655 | -1.6184 |
| C | -3.9131 | -6.9924 | -1.1369 |
| C | -2.5487 | -7.3296 | -1.0443 |
| C | -2.1636 | -8.6651 | -1.247  |
| C | -3.1299 | -9.6216 | -1.5307 |
| S | -4.1897 | -5.2803 | -0.8479 |
| C | -2.4572 | -4.9811 | -0.5867 |
| C | -1.7249 | -6.1735 | -0.7491 |
| C | -1.8151 | -3.7306 | -0.3263 |
| C | -0.386  | -3.7246 | -0.3185 |
| C | 0.32175 | -4.9447 | -0.472  |

|   |         |         |         |
|---|---------|---------|---------|
| C | -0.322  | -6.1412 | -0.6646 |
| H | -4.4902 | -3.3162 | 0.32967 |
| H | -4.4901 | 3.31607 | 0.33424 |
| H | 2.28392 | -3.3557 | -0.1022 |
| H | 2.28369 | 3.35621 | -0.0961 |
| H | 4.19481 | -3.3909 | 0.0075  |
| H | 6.64799 | -3.3469 | 0.13993 |
| H | 6.64658 | 3.34721 | 0.16769 |
| H | 4.19343 | 3.39127 | 0.03457 |
| H | 13.0987 | 0.00582 | -1.643  |
| H | 14.2128 | 0.00046 | 0.5615  |
| H | 12.8671 | -0.0051 | 2.63275 |
| H | -11.096 | 0.01353 | -0.5476 |
| H | -11.877 | -0.0009 | 1.79577 |
|   |         |         |         |
| H | -10.244 | -0.0152 | 3.64881 |
| H | -7.461  | 0.01073 | -1.5179 |
| H | -10.115 | -1.305  | -2.2933 |
| H | -8.6409 | -1.2556 | -3.2686 |
| H | -8.6628 | -2.1507 | -1.7352 |
| H | -10.101 | 1.36862 | -2.2694 |
| H | -8.6389 | 2.18863 | -1.6977 |
| H | -8.6275 | 1.32026 | -3.2467 |
| H | -6.5184 | -0.0107 | 3.1242  |
| H | -6.9231 | 1.2521  | 5.19845 |
| H | -7.5424 | 2.1487  | 3.79644 |
| H | -8.6608 | 1.30016 | 4.87559 |
| H | -8.6544 | -1.3738 | 4.84326 |
| H | -7.53   | -2.1908 | 3.74603 |
| H | -6.9172 | -1.3237 | 5.1695  |
| H | 9.10464 | -0.0068 | 2.65592 |
| H | 11.4742 | -1.3445 | 4.06028 |
| H | 9.802   | -1.2985 | 4.63282 |
| H | 10.2083 | -2.1768 | 3.14377 |
| H | 11.4722 | 1.32894 | 4.06554 |
| H | 10.2047 | 2.16295 | 3.15282 |
| H | 9.80019 | 1.2778  | 4.63833 |
| H | 9.36071 | 0.00758 | -2.0726 |
| H | 11.8692 | 1.34389 | -3.212  |

|   |         |         |         |
|---|---------|---------|---------|
| H | 10.2694 | 1.2973  | -3.9636 |
| H | 10.5108 | 2.17683 | -2.4398 |
| H | 11.8665 | -1.3303 | -3.2161 |
| H | 10.5061 | -2.1628 | -2.447  |
| H | 10.2669 | -1.2778 | -3.968  |
| H | 0.25127 | 7.05517 | -0.7826 |
| H | 1.40305 | 4.94793 | -0.4619 |
| H | -5.9387 | 7.67407 | -1.4808 |
| H | -5.2294 | 10.0265 | -1.8337 |
| H | -2.8358 | 10.6558 | -1.6793 |
| H | -1.1181 | 8.95079 | -1.1743 |
| H | -5.9384 | -7.6732 | -1.4873 |
| H | -5.229  | -10.025 | -1.8407 |
| H | -1.1178 | -8.95   | -1.1797 |
| H | -2.8354 | -10.655 | -1.6858 |
| H | 1.4031  | -4.9475 | -0.465  |
| H | 0.25138 | -7.0546 | -0.7868 |

## V. Crystallographic data:

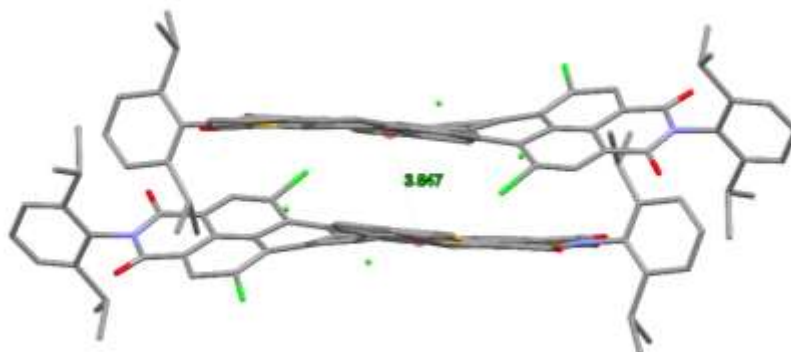

Figure S24.  $\pi$ - $\pi$  interaction in TDI-cDBT+Cl as seen from SCXRD structure.

**Table S10.** SCXRD data and structure refinement parameters for **TDI-cDBT+Cl**.

| Identification code                         | <b>TDI-cDBT+Cl</b>                                                     |
|---------------------------------------------|------------------------------------------------------------------------|
| Empirical formula                           | $C_{86}H_{56}Cl_{10}N_2O_4S_2$                                         |
| CCDC number                                 | 2293830                                                                |
| Formula weight                              | 1599.94                                                                |
| Temperature/K                               | 100(2)                                                                 |
| Wavelength/Å                                | 0.700                                                                  |
| Crystal system                              | Triclinic                                                              |
| Space group                                 | <i>P</i> -1                                                            |
| <i>a</i> /Å                                 | 16.800(3)                                                              |
| <i>b</i> /Å                                 | 18.200(4)                                                              |
| <i>c</i> /Å                                 | 18.900(4)                                                              |
| $\alpha$ /°                                 | 110.00(3)                                                              |
| $\beta$ /°                                  | 101.00(3)                                                              |
| $\gamma$ /°                                 | 106.00(3)                                                              |
| Volume/Å <sup>3</sup>                       | 4953(2)                                                                |
| Z                                           | 2                                                                      |
| $\rho_{\text{calc}}$ /cm <sup>3</sup>       | 1.073                                                                  |
| $\mu$ /mm <sup>-1</sup>                     | 0.345                                                                  |
| F(000)                                      | 1640                                                                   |
| Crystal size/mm <sup>3</sup>                | 0.1 x 0.05 x 0.02                                                      |
| 2 $\Theta$ range for data collection/°      | 1.19 to 24.5                                                           |
| Index ranges                                | -19 $\leq$ h $\leq$ 19, -20 $\leq$ k $\leq$ 21, -22 $\leq$ l $\leq$ 22 |
| Reflections collected                       | 43605                                                                  |
| Independent reflections                     | 5557                                                                   |
| Data/restraints/parameters                  | 16646/862/652                                                          |
| Goodness-of-fit on F <sup>2</sup>           | 1.514                                                                  |
| Final R indexes [ $I \geq 2\sigma(I)$ ]     | R1 = 0.1993, wR2 = 0.5119                                              |
| Final R indexes [all data]                  | R1 = 0.2818, wR2 = 0.5644                                              |
| Largest diff. peak/hole / e Å <sup>-3</sup> | 0.913 and -0.492                                                       |

## VI. NMR Spectra

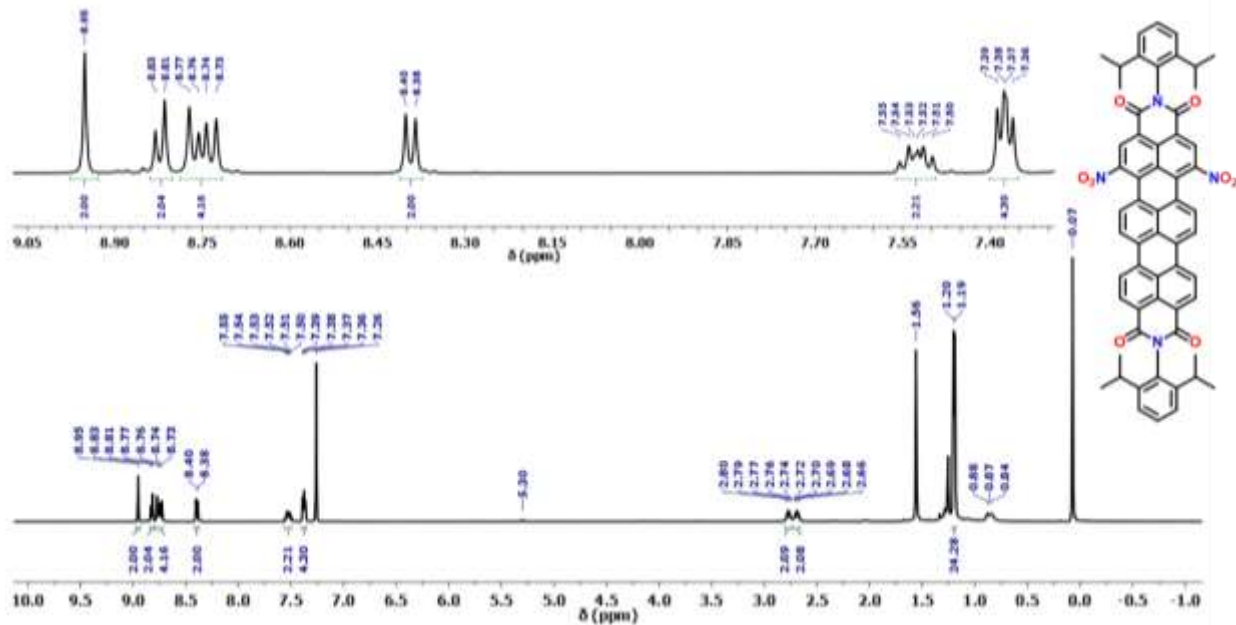

Figure S25.  $^1\text{H}$  NMR spectra of 1,6-TDI-(NO<sub>2</sub>)<sub>2</sub> (500 MHz, CDCl<sub>3</sub>, 298 K).

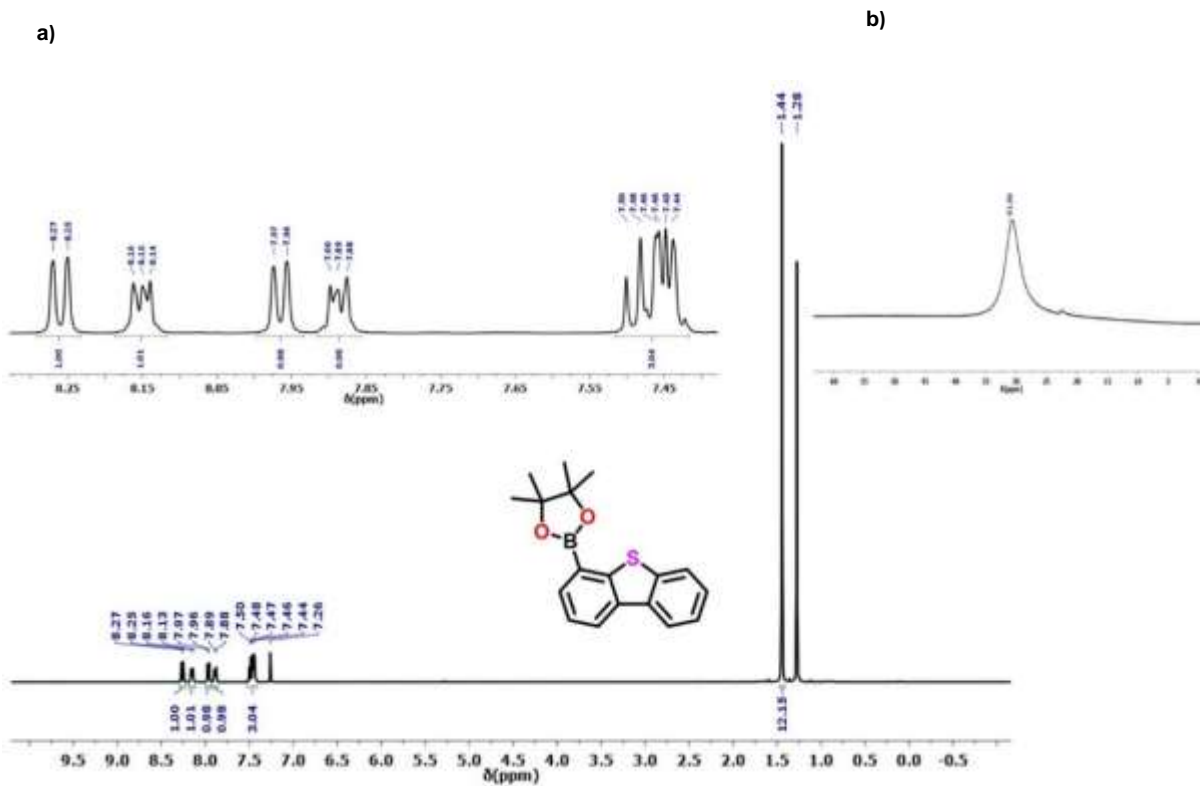

Figure S26. a)  $^1\text{H}$  and b)  $^{11}\text{B}$ -NMR spectra for DBT-B (500 MHz, CDCl<sub>3</sub>, 298 K).



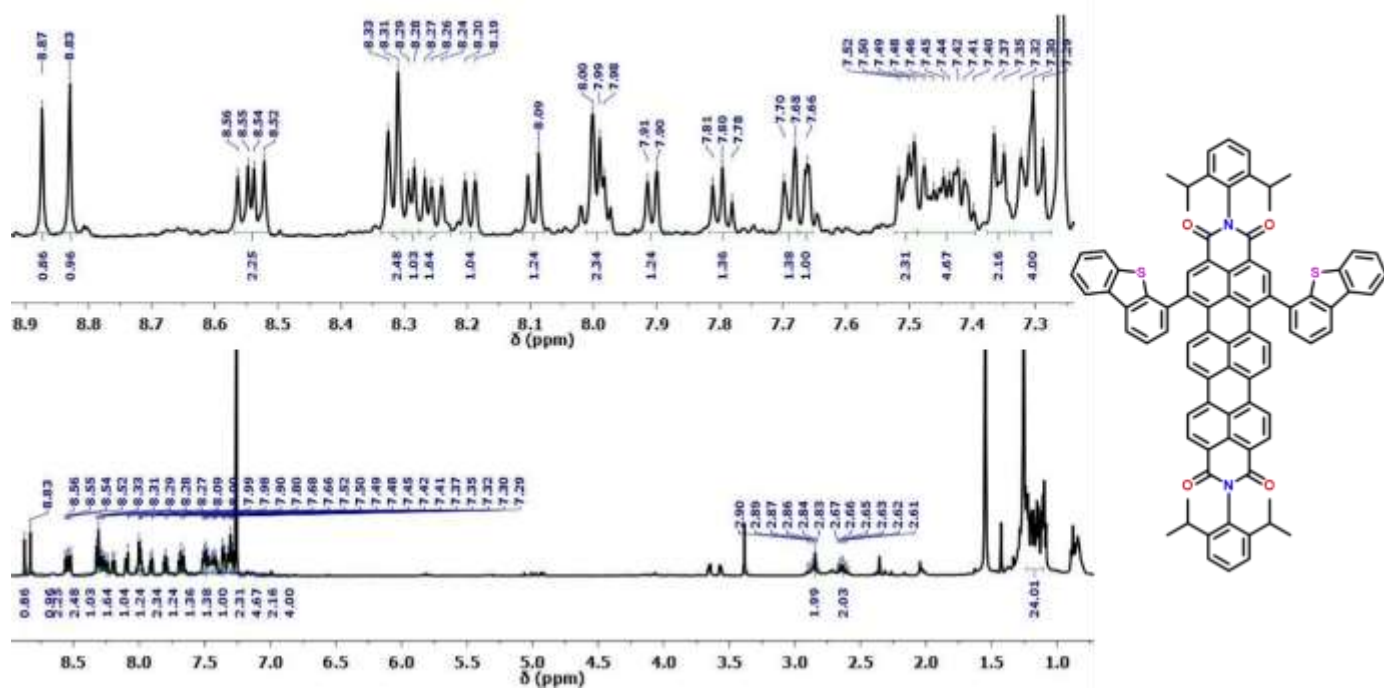

Figure S27.  $^1\text{H}$  NMR spectra of TDI-sDBT (500 MHz,  $\text{CDCl}_3$ , 298 K).

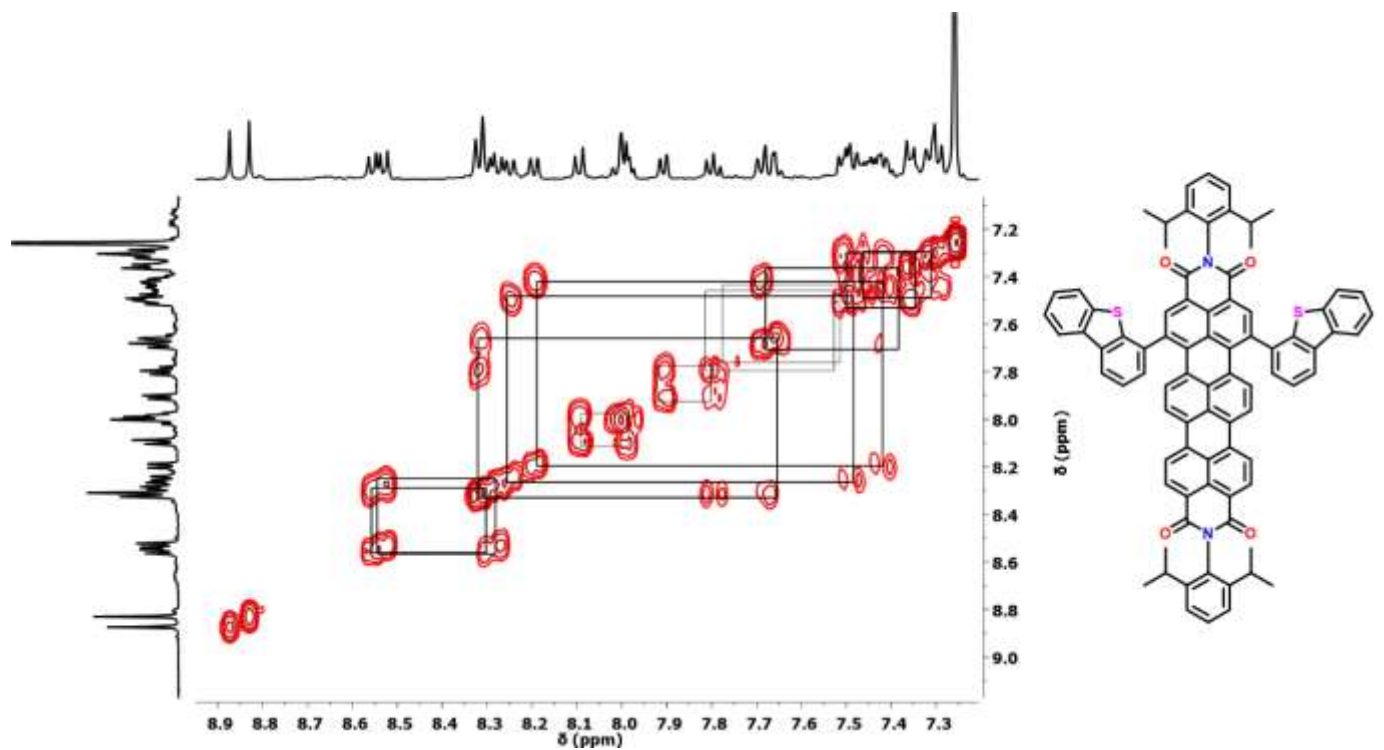

Figure S28.  $^1\text{H}$ - $^1\text{H}$  correlation (COSY) NMR spectra of TDI-sDBT (500 MHz,  $\text{CDCl}_3$ , 298 K).

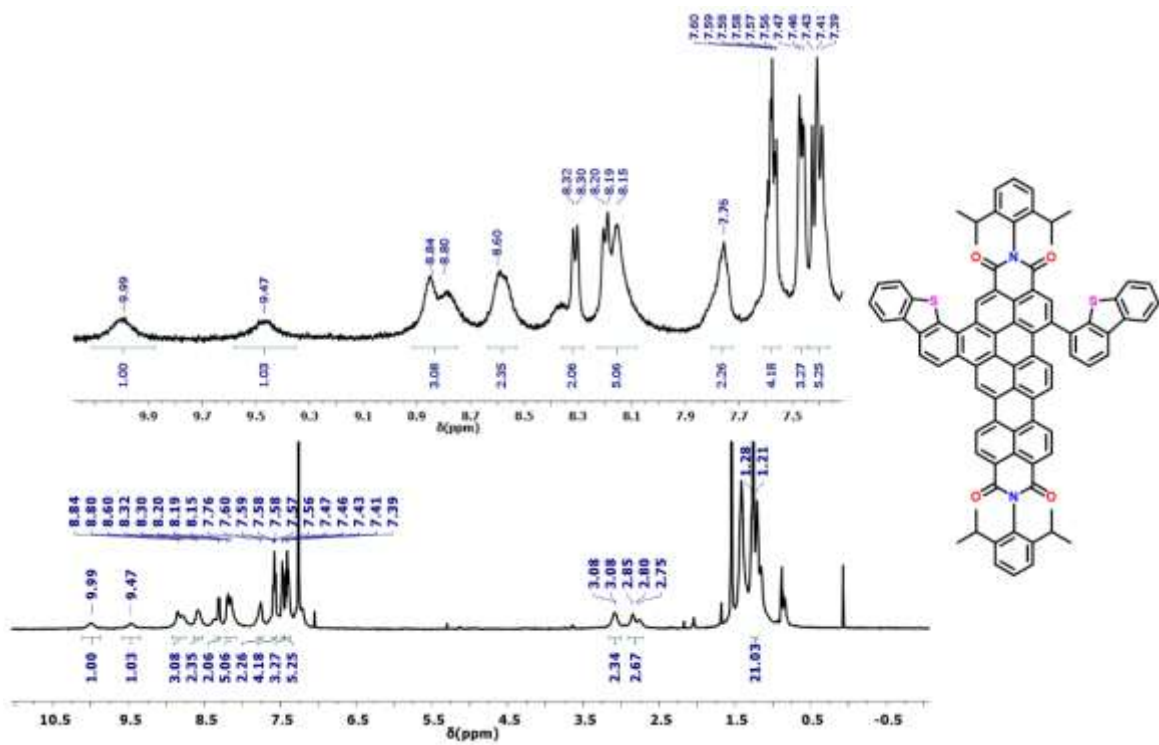

Figure S29.  $^1\text{H}$  NMR spectra of TDI-scDBT (500 MHz,  $\text{CDCl}_3$ , 298 K).

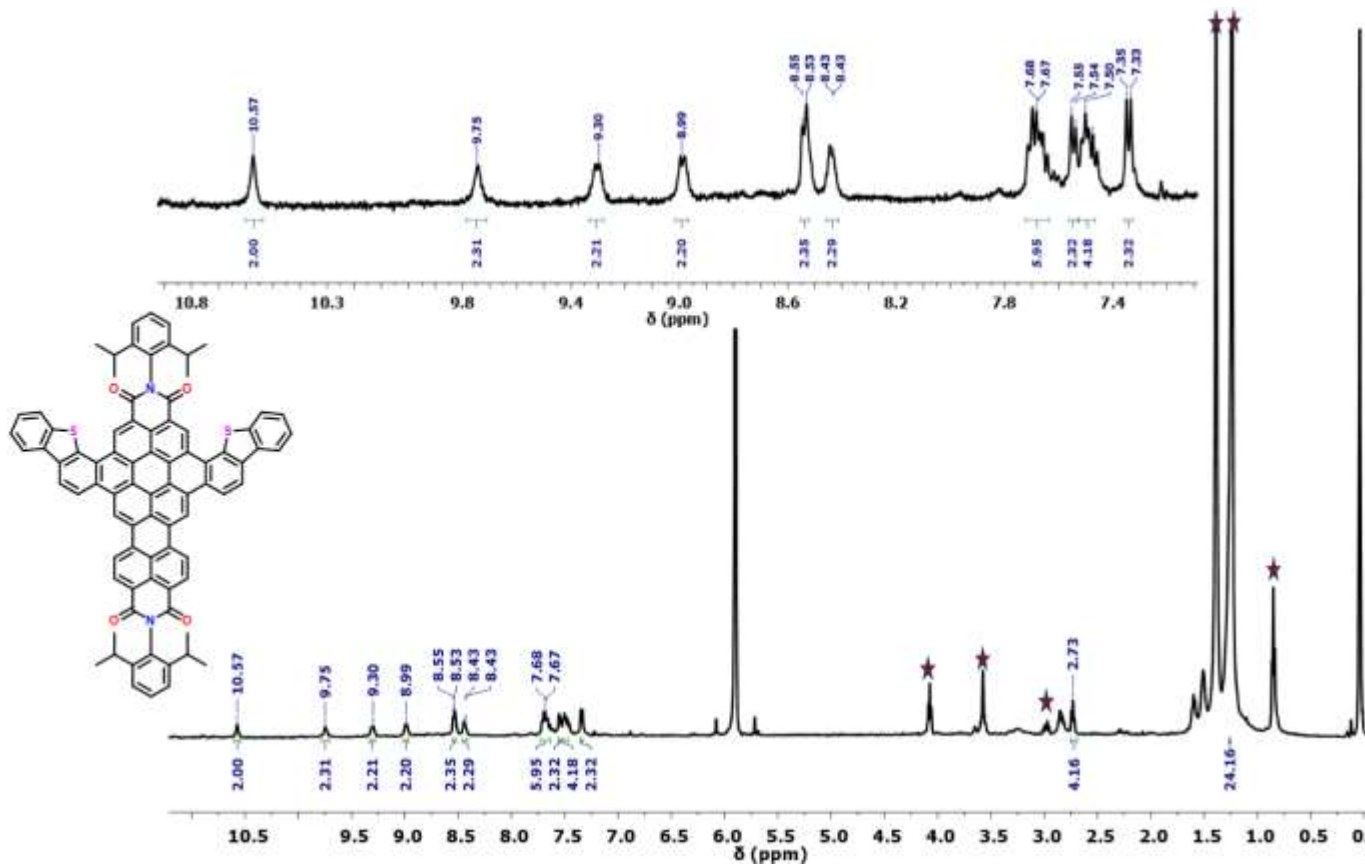

Figure S30.  $^1\text{H}$  NMR spectra of TDI-cDBT (500 MHz,  $\text{C}_2\text{D}_2\text{Cl}_4$ , 363 K). Asterisk indicates residual solvent peaks.

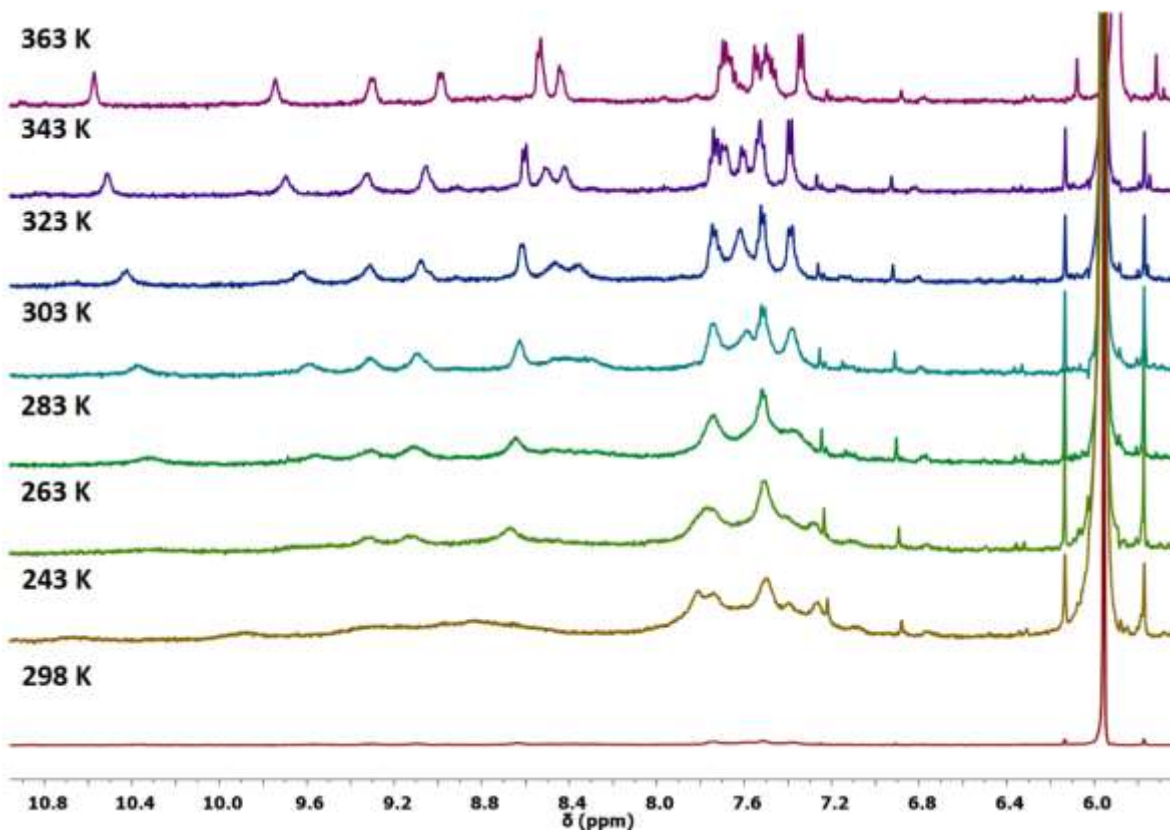

Figure S31. Variable temperature  $^1\text{H}$  NMR spectra of TDI-cDBT (500 MHz,  $\text{C}_2\text{D}_2\text{Cl}_4$ ).

## VII. Mass Spectra

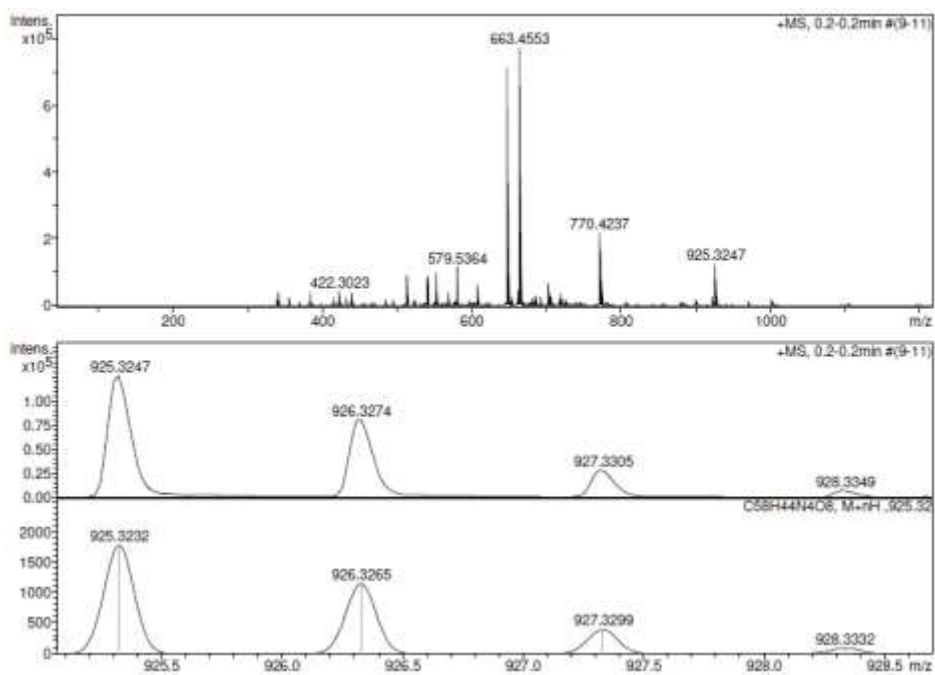

Figure S32. APCI-HRMS spectra of 1,6-TDI-( $\text{NO}_2$ ) $_2$ .

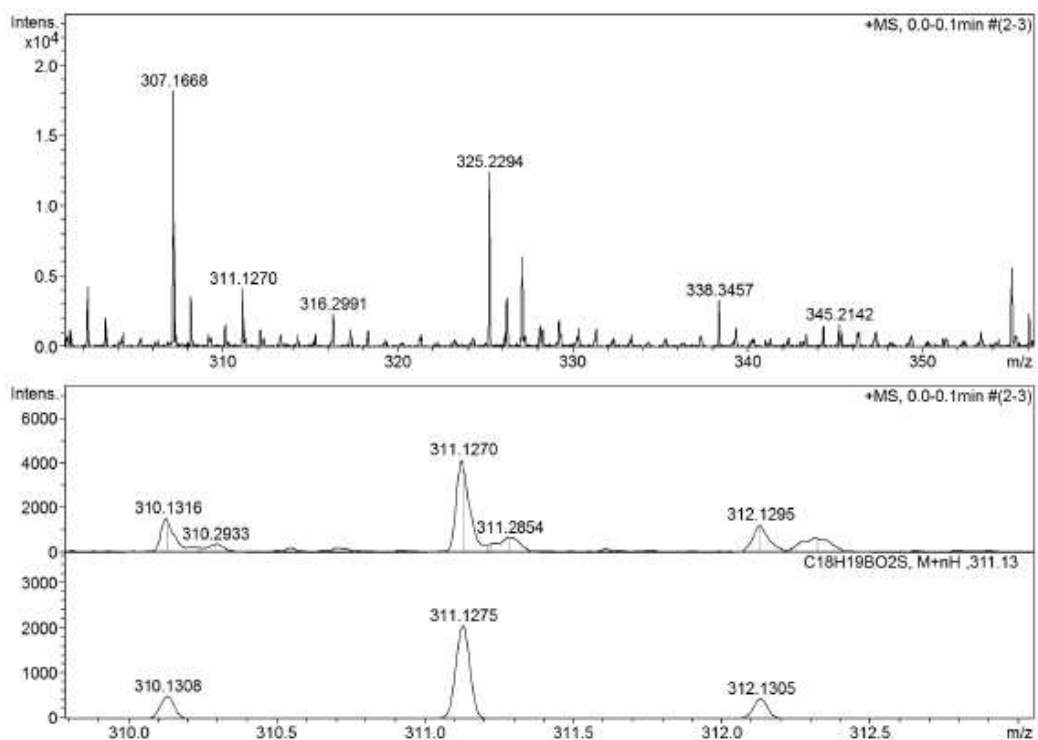

Figure S33 APCI-HRMS spectra of DBT-B.

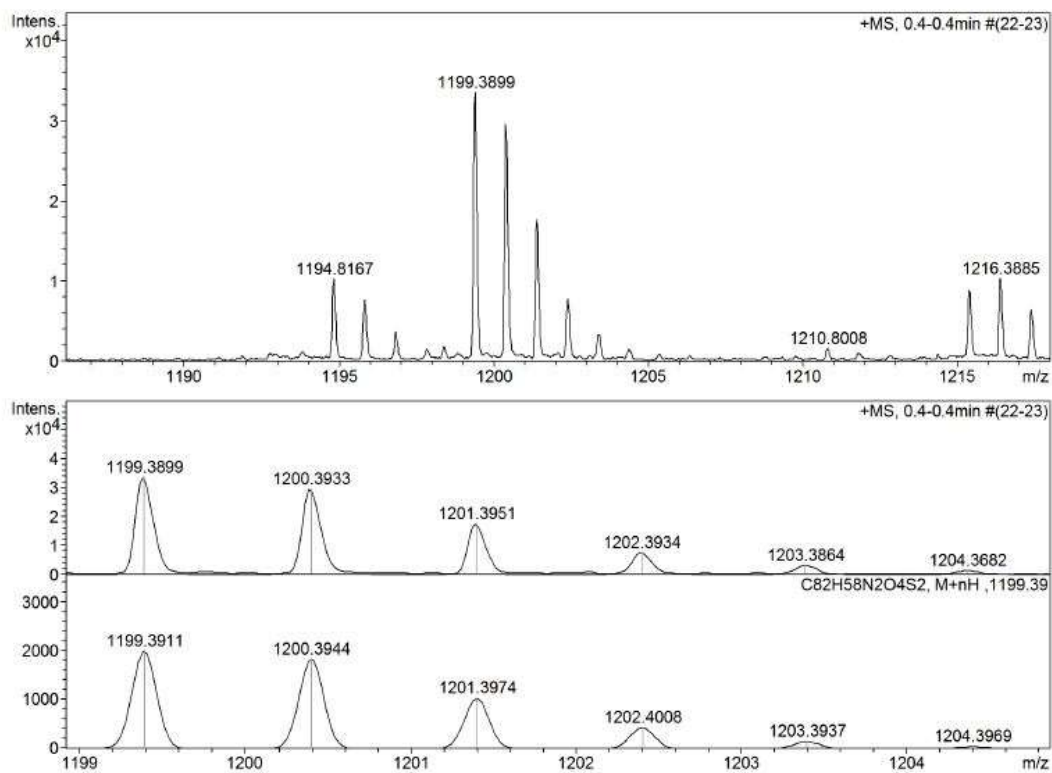

Figure S34. APCI-HRMS spectra of TDI-sDBT.

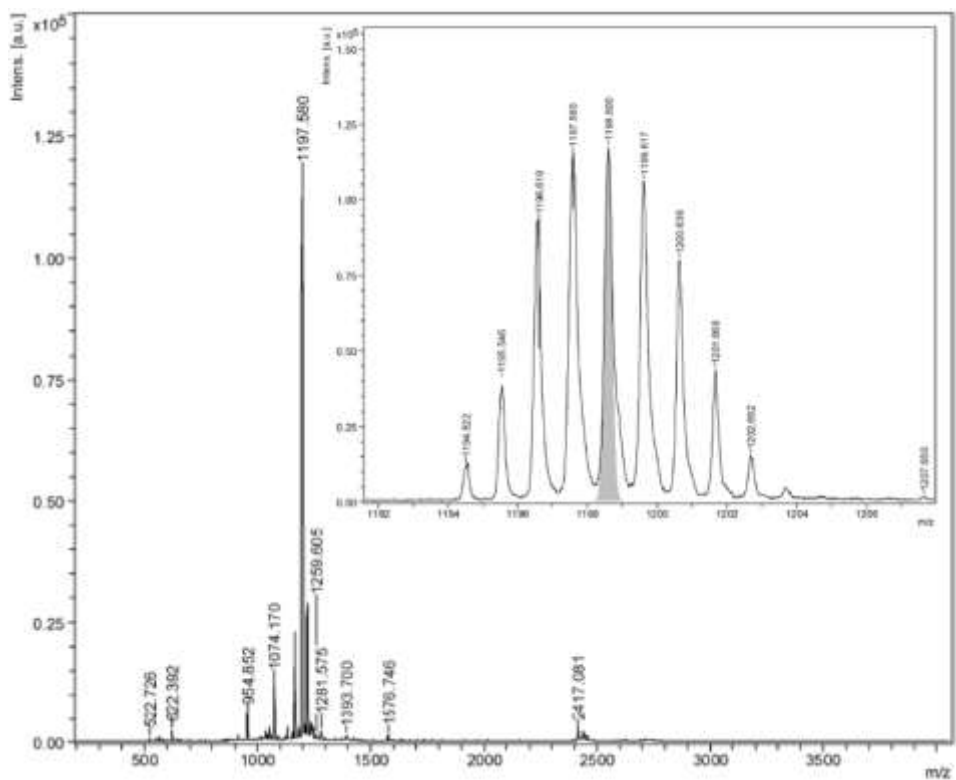

Figure S35. MALDI-TOF spectra of TDI-scDBT.

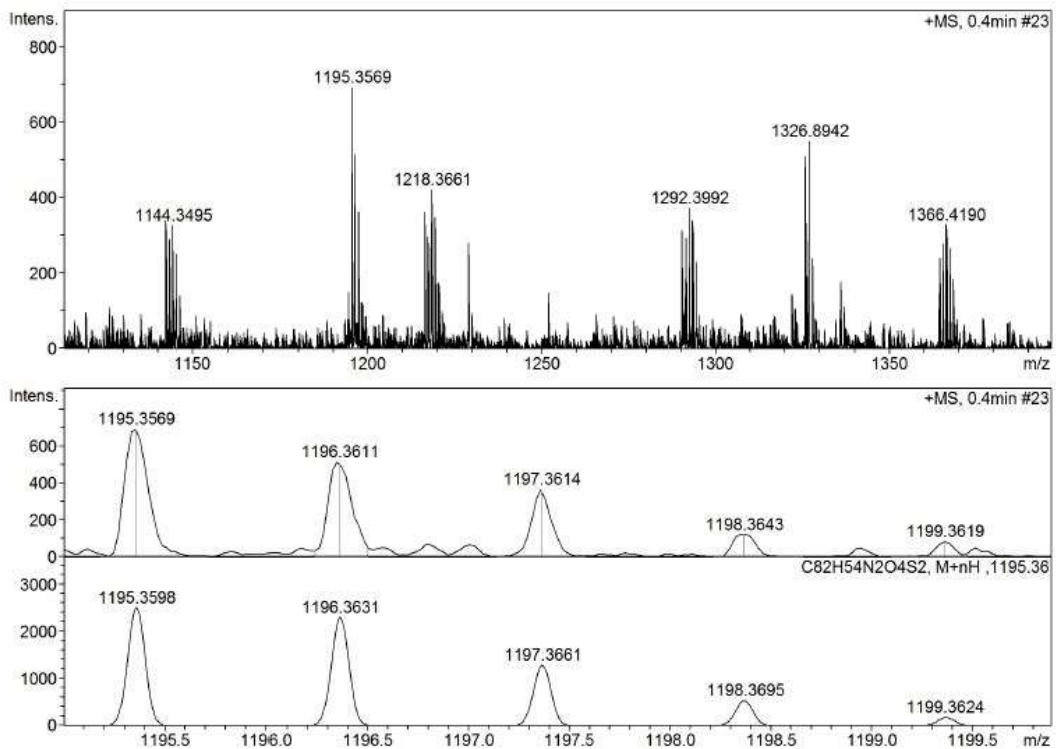

Figure S36. APCI-HRMS spectra of TDI-cDBT.

## VIII. References:

- (1) A. Lausi, M. Polentarutti, S. Onesti, J. R. Plaisier, E. Busetto, G. Bais, L. Barba, A. Cassetta, G. Campi, D. Lamba, A. Pifferi, S. C. Mande, D. D. Sarma, S. M. Sharma and G. Paolucci, *Eur. Phys. J. Plus*, 2015, **130**, 1-8.
- (2) W. Kabsch XDS. *Acta Crystallogr. D*, 2010, **66**, 125-132.
- (3) O. V. Dolomanov, L. J. Bourhis, R. J. Gildea, J. A. K. Howard and H. Puschmann, *J. Appl. Crystallogr.*, 2009, **42**, 339-341.
- (4) G. M. Sheldrick, *Acta Crystallogr. Sect. A Found. Adv.*, 2015, **71**, 3-8.
- (5) G. M. Sheldrick, *Acta Crystallogr. Sect. C Struct. Chem.*, 2015, **71**, 3-8.
- (6) M. J. Frisch, G. W. Trucks, H. B. Schlegel, G. E. Scuseria, M. A. Robb, J. R. Cheeseman, G. Scalmani, V. Barone, B. Mennucci, G. A. Petersson, H. Nakatsuji, M. Caricato, X. Li, H. P. Hratchian, A. F. Izmaylov, J. Bloino, G. Zheng, J. L. Sonnenberg, M. Hada, M. Ehara, K. Toyota, R. Fukuda, J. Hasegawa, M. Ishida, T. Nakajima, Y. Honda, O. Kitao, H. Nakai, T. Vreven, J. A. Montgomery Jr., J. E. Peralta, F. Ogliaro, M. Bearpark, J. J. Heyd, E. Brothers, K. N. Kudin, V. N. Staroverov, R. Kobayashi, J. Normand, K. Raghavachari, A. Rendell, J. C. Burant, S. S. Iyengar, J. Tomasi, M. Cossi, N. Rega, J. M. Millam, M. Klene, J. E. Knox, J. B. Cross, V. Bakken, C. Adamo, J. Jaramillo, R. Gomperts, R. E. Stratmann, O. Yazyev, A. J. Austin, R. Cammi, C. Pomelli, J. W. Ochterski, R. L. Martin, K. Morokuma, V. G. Zakrzewski, G. A. Voth, P. Salvador, J. J. Dannenberg, S. Dapprich, A. D. Daniels, Ö. Farkas, J. B. Foresman, J. V. Ortiz, J. Cioslowski and D. J. Fox, Gaussian 09, Revision D.01, Gaussian, Inc. Wallingford CT, 2013.
- (7) D. H. Oh, J. Park, H. Cho, G. Lee, D. Kim, J. Park, S. Lee and S. Hwang (DUK SAN NEOLUX CO., LTD.), US20210288262, 2021.
- (8) K. S. Mehra, S. Jha, A. M. Menon, D. Chopra and J. Sankar, *Chem. Sci.*, 2023, **14**, 3147-3153.
- (9) M. Bendikov, H. M. Duong, K. Starkey, K. N. Houk, E. A. Carter and F. Wudl, *J. Am. Chem. Soc.*, 2004, **126**, 7416-7417.
- (10) M. Adachi and Y. Nagao, *Chem. Mater.*, 2001, **13**, 662-669.
- (11) J. Hachmann, J. J. Dorando, M. Avilés and G. K.-L. Chan, *J. Chem. Phys.*, 2007, **127**, 134309.
- (12) C. U. Ibeji and D. Ghosh, *Phys. Chem. Chem. Phys.*, 2015, **17**, 9849-9856.
- (13) M. Rano, S. K. Ghosh and D. Ghosh, *Chem. Sci.*, 2019, **10**, 9270-9276.
- (14) M. Dey and D. Ghosh, *J. Phys. Chem. L*, 2022, **13**, 50, 11795-11800.
